# Supplementary material for: Factors affecting the acceptability of isoniazid preventive therapy among healthcare providers in selected HIV clinics in Nairobi County, Kenya: a qualitative study
Source: PubMed Central journal article supplement — BMJ Open. 2018 Dec 19;8(12):e024286. doi: 10.1136/bmjopen-2018-024286 (PMC6303693; doi:10.1136/bmjopen-2018-024286), 2018-12-19
Supplement: bmjopen-2018-024286.draft_revisions.pdf [file bmjopen-2018-024286.draft_revisions.pdf]

# BMJ Open

BMJ Open is committed to open peer review. As part of this commitment we make the peer review history of every article we publish publicly available.

When an article is published we post the peer reviewers' comments and the authors' responses online. We also post the versions of the paper that were used during peer review. These are the versions that the peer review comments apply to.

The versions of the paper that follow are the versions that were submitted during the peer review process. They are not the versions of record or the final published versions. They should not be cited or distributed as the published version of this manuscript.

BMJ Open is an open access journal and the full, final, typeset and author-corrected version of record of the manuscript is available on our site with no access controls, subscription charges or pay-per-view fees (<http://bmjopen.bmj.com>).

If you have any questions on BMJ Open's open peer review process please email [info.bmjopen@bmj.com](mailto:info.bmjopen@bmj.com)

# BMJ Open

## Factors affecting the acceptability of isoniazid preventive therapy among health care providers in selected HIV clinics in Nairobi County, Kenya: A qualitative study

|                               |                                                                                                                                                                                                                                                                                                                                                                                                                                                                                                                                                                                |
|-------------------------------|--------------------------------------------------------------------------------------------------------------------------------------------------------------------------------------------------------------------------------------------------------------------------------------------------------------------------------------------------------------------------------------------------------------------------------------------------------------------------------------------------------------------------------------------------------------------------------|
| Journal:                      | <i>BMJ Open</i>                                                                                                                                                                                                                                                                                                                                                                                                                                                                                                                                                                |
| Manuscript ID                 | bmjopen-2018-024286                                                                                                                                                                                                                                                                                                                                                                                                                                                                                                                                                            |
| Article Type:                 | Research                                                                                                                                                                                                                                                                                                                                                                                                                                                                                                                                                                       |
| Date Submitted by the Author: | 18-May-2018                                                                                                                                                                                                                                                                                                                                                                                                                                                                                                                                                                    |
| Complete List of Authors:     | Wambiya, Elvis; African Population and Health Research Center, Research; University of the witwatersrand, School of Public Health<br>Atela, Martin; Partnership for African Social and Governance Research, Research; University of Nairobi, Public Health<br>Eboime, Ejemai; University of the Witwatersrand Centre for Health Policy, Public Health; National Primary Health Care Development Agency, Planning, Research and Statistics<br>Ibisomi, Latifat; University of Witswaterstrand, School of Public Health; Nigerian Institute of Medical Research (NIMR), Research |
| Keywords:                     | HIV & AIDS < INFECTIOUS DISEASES, Tuberculosis < INFECTIOUS DISEASES, QUALITATIVE RESEARCH, Public health < INFECTIOUS DISEASES                                                                                                                                                                                                                                                                                                                                                                                                                                                |
|                               |                                                                                                                                                                                                                                                                                                                                                                                                                                                                                                                                                                                |

SCHOLARONE™  
Manuscripts

1  
2  
3 **Factors affecting the acceptability of isoniazid preventive therapy among health care providers**  
4 **in selected HIV clinics in Nairobi County, Kenya: A qualitative study**  
5

6 **Corresponding author:** Elvis Omondi Achach Wambiya, P.O. Box 205 – 00242, Kitengela,  
7 Kenya, Email: [eowambiya@gmail.com](mailto:eowambiya@gmail.com). Telephone: +254797184545  
8

9 Dr. Martin Atela, Partnership for Social and Governance Research; College of Health  
10 Sciences, University of Nairobi ; PO Box 53542 - 00200 Nairobi, Kenya. Email:  
11 [m.atelah@googlemail.com](mailto:m.atelah@googlemail.com), Telephone: +254733280413  
12

13 Dr. Ejemai Eboreime, University of the Witwatersrand, School of Public Health, Centre for  
14 Health Policy, Johannesburg, South Africa; National Primary Health Care Development  
15 Agency, Department of Planning Research & Statistics Abuja, Nigeria, 1 Jan Smuts Avenue,  
16 Braamfontein, Johannesburg, 2000, South Africa, Email: [ejemai.eboreime@wits.ac.za](mailto:ejemai.eboreime@wits.ac.za),  
17 Telephone: +2347035763597  
18

19 Prof. Latifat Ibisomi, University of the Witwatersrand, School of Public Health, Division of  
20 Epidemiology and Biostatistics; Nigerian Institute of Medical Research (NIMR), Lagos  
21 Nigeria. 1 Jan Smuts Avenue, Braamfontein, Johannesburg, 2000, South Africa. Email:  
22 [Latifat.Ibisomi@wits.ac.za](mailto:Latifat.Ibisomi@wits.ac.za). Telephone: +27 (0) 11 717 2607  
23  
24  
25

26 Word count: 4885  
27  
28  
29  
30  
31  
32  
33  
34  
35  
36  
37  
38  
39  
40  
41  
42  
43  
44  
45  
46  
47  
48  
49  
50  
51  
52  
53  
54  
55  
56  
57  
58  
59  
60

**Research question**

What are the factors affecting the acceptability of isoniazid preventive therapy among health care providers in selected HIV clinics in Nairobi County, Kenya?

**ABSTRACT****Objective**

Despite being globally recommended as an effective intervention in tuberculosis (TB) prevention among people living with HIV (PLHIV), Isoniazid preventive therapy (IPT) implementation remains sub-optimal, especially in sub-Saharan Africa. This study explored the factors influencing the acceptability of IPT among health care providers in selected HIV clinics in Nairobi County, Kenya, a high HIV/TB burden country.

**Design**

A qualitative study was conducted using in-depth interviews with health care providers in selected HIV clinics. All conversations were audio-recorded, transcribed verbatim and thematic content analysis done.

**Setting**

The study was conducted in the HIV clinics of three purposefully selected public health care facilities in Nairobi County, Kenya between January 2017 and April 2017.

**Participants**

Eighteen purposefully selected health care providers (clinicians, nurses, pharmacists and counsellors) working in the HIV clinics participated in the study.

**Results**

IPT was not fully accepted by health care providers in this context. Provider acceptability was influenced by factors at different levels of health service provision. These included factors related to the organizational context, provider training on IPT and their perception on its efficacy, length and clarity of IPT guidelines and standard operation procedures, and structural level (policy, physical and working environment) factors. Among them, structural, provider, and patient-related factors stood out as key influencers of IPT acceptability among the health care providers.

**Conclusion**

Even though Kenya has adopted the WHO recommended guidelines on HIV/TB management through IPT, a general low level of acceptability of this therapy among health care providers is a barrier to its successful implementation. To overcome this barrier, policy makers and programme managers should address the acceptability among providers. Ensuring optimal acceptability of IPT among health care providers will require expanded depth of engagement

1  
2  
3  
4  
5  
6  
7  
8  
9  
10  
11  
12  
13  
14  
15  
16  
17  
18  
19  
20  
21  
22  
23  
24  
25  
26  
27  
28  
29  
30  
31  
32  
33  
34  
35  
36  
37  
38  
39  
40  
41  
42  
43  
44  
45  
46  
47  
48  
49  
50  
51  
52  
53  
54  
55  
56  
57  
58  
59  
60

with both providers and patients and on-the-job design specific actions to support providers in implementation.

**Key Words:** Acceptability, Isoniazid, Comprehensive care centre, health care provider, HIV/TB

For peer review only

## Article Summary:

### Strengths and Limitations of this study

- To our knowledge, this is among the first qualitative studies exploring factors influencing the acceptability of Isoniazid preventive therapy among health care providers in the context of HIV clinics providing integrated HIV and TB services.
- The inclusion of both clinical and non-clinical health care providers in the study enabled the collection of information at different levels and cadres of health service provision thereby enhancing the breadth and validity of the information obtained.
- The adaptation of existing theory and literature to guide the study enabled the collection of exhaustive context-specific information at different levels of the health system.
- Purposive selection of the health facilities included in the study may limit the generalizability of our findings beyond the study context though the conclusions and recommendations are useful and applicable in other contexts.

## INTRODUCTION

Tuberculosis (TB) and (Human Immunodeficiency Virus) HIV co-infection remain a major public health threat and challenge to health systems in many Low and Middle-income Countries (LMICs). The threat is more pronounced for people living with HIV (PLHIV). The World Health Organization (WHO) estimates that PLHIV account for 1.2 million (11%) of the 10.4 million reported incidence of TB in 2015 (1). PLHIV are about 20 to 30 times more likely to develop active TB compared to those without HIV. Moreover, TB is the leading cause of death among PLHIV (in 2015, one in three deaths in PLHIV was attributed to TB) (2). HIV and TB co-infection also places immense burden on health systems in LMICs and threatens global TB and HIV reduction targets (3, 4). The HIV/TB co-infection burden is heaviest in Africa which accounts for 74% of cases globally (2).

The high burden countries account for 85-89% of the estimated global burden of TB cases each year among PLHIV (5). Kenya is one of the countries with high burden of TB, HIV/TB and multi-drug resistant TB (MDR-TB) (5). Nonetheless, Kenya has made considerable progress in reducing the HIV/TB co-infection rate (from 45% in 2008 to 33% in 2015) (6). Although this rate is higher than the current global average of 15%, it is lower than the African region co-infection rate which was 36% in 2015. In 2015, approximately 25,030 (31%) of the 81,518 persons who developed TB in Kenya were HIV infected (6).

1  
2  
3  
4 To reduce the burden of TB among people living with HIV, the WHO recommends three  
5 interventions collectively termed 'the Three I's for TB/HIV namely: intensified TB case-  
6 finding, Isoniazid Preventive Therapy (IPT) and infection control for TB (7, 8). IPT is an  
7 evidence-based intervention with proven effectiveness of reducing the risk of TB in PLHIV  
8 by 33-62% (9). It is recommended for individuals with documented latent infection with  
9 *Mycobacterium tuberculosis* to prevent progression to active disease, and for PLHIV in areas  
10 with high HIV prevalence and latent TB prevalence greater than 30% (7-9). IPT involves the  
11 provision of isoniazid (INH) tablets to PLHIV who are TB negative or have latent TB. The  
12 dose varies between 5mg/kg for children to 300 mg/kg for adults (10, 11). WHO guidelines  
13 strongly recommend at least 6 months of IPT for children and adults including pregnant  
14 women, PLHIV, those receiving anti-retroviral therapy (ART) and those who have  
15 successfully completed TB treatment (12). In areas of high prevalence and transmission of  
16 TB among PLHIV, IPT is conditionally recommended for 36 months as a proxy for lifelong  
17 or continuous treatment (12).

18  
19 In 2012, Kenya adopted the 6 month IPT regimen for eligible persons intended to elicit TB  
20 prevention for a maximum period of two years (13). Countywide scale-up of IPT begun in  
21 March 2015 with Siaya, Kisumu, Migori, Homa-bay and Nairobi as the pioneer counties due  
22 to their high HIV rates (6). Its roll-out was complemented with an ambitious target of  
23 countrywide enrolling 90% of PLHIV (839,797 adults and 79,594 children) on IPT by  
24 December 2016 (6). However, widespread evidence of sub-optimal IPT implementation has  
25 been reported in Kenya (1, 6, 7). The latest IPT coverage survey indicated that only 29,924  
26 (3.6%) adults and 7,934 (10%) children eligible were initiated on IPT in 2015 (6). While  
27 suboptimal IPT implementation is well documented, little is known about contextual factors  
28 that influence its implementation.

29  
30 Moreover, the literature on its acceptability among health care providers is scant. This study  
31 responds to this gap through an in-depth analysis of the factors influencing the acceptability  
32 of IPT among health care providers in selected HIV clinics in Nairobi County, Kenya (a high  
33 HIV/TB burden country). Acceptability is one of the implementation outcomes used to assess  
34 how well implementation has occurred and provide insights on how this contributes to  
35 important health outcomes (14, 15). The study adopted Proctor and colleagues' definition of  
36 acceptability as 'the perception among implementation stakeholders that a given treatment,  
37 service, practice or innovation is agreeable, palatable or satisfactory' (14).

## METHODS

**Study design:** This was a qualitative descriptive study using semi-structured, in-depth interviews. The design, data collection, analysis and reporting were conducted in accordance with the consolidated criteria for reporting qualitative research (COREQ) (16).

**Study setting:** The study was conducted in three facilities in Nairobi City County which is one of the 47 counties in Kenya with a population of about 3,138,369 people between January and April 2017 (17). Nairobi County was selected because it is one of the pioneer counties for the national rollout of IPT in 2015 and hence it was expected that the health facilities in the county would be implementing the intervention. The study adopted a cross-sectional approach. Three public healthcare facilities - Facility A, Facility B and Facility C - were purposefully selected based on physical location, size, and the high volumes of HIV and TB patients who access integrated treatment services. Data were gathered from in-depth interviews with staff working in the HIV clinics- referred to here as Comprehensive Care Centres (CCCs) - in the three facilities. Facility A is a national referral hospital whose CCC houses about 45 health personnel of different cadres. At the time of the study, the total number of patients in HIV care was 10,226, with an IPT uptake of 5,733 in the last quarter of 2016. An average of 1,974 patients visited the clinic per month in the last quarter of 2016. Facility B is a County referral hospital. At the time of the study, it had about 25 healthcare providers in the CCC, 4,860 patients enrolled for care, with IPT uptake at 839 patients in the last quarter of 2016. Facility C is a sub-county hospital with about 25 healthcare providers in the CCC. At the time of the study, it had 1,133 patients enrolled in care, 205 of which were initiated on IPT in the last quarter of 2016.

**Study participants:** The study participants were health care providers (clinicians, nurses, pharmacists and counsellors) working in the HIV clinics of the selected health facilities between January and June 2017. Respondents must have been involved in the IPT programme and worked in the clinic for at least six months prior to the study. Those who were absent during study period were excluded. Eighteen health care providers from the three CCCs were purposefully selected to ensure adequate representation in terms of sex, job cadre and length of stay at the facility. All consented to participate in the study.

**Sampling and recruitment:** Study participants were recruited through purposive sampling. This was facilitated by the researcher (EW) and the head nurses of the study HIV clinics. Pre-study meetings were convened in the clinics with facility managers and clinic staff to promote the study to eligible participants. EW approached prospective participants and



1  
2  
3 established contact to identify possible dates, times and venues for interviews with respect to  
4 the study period.

5  
6 **Data collection:** In-depth interviews were conducted by the researcher (EW) using an  
7 interview guide patterned after the themes of the conceptual framework of factors affecting  
8 implementation outcomes by Chaudoir et al. (2013). The framework groups factors affecting  
9 acceptability under five main categories: organizational factors, patient-level factors, provider  
10 level factors, structural factors and innovation characteristics (Appendix 1). The interviews  
11 were conducted in English language at the health facilities, at the convenience of the  
12 participant and in private. Each session lasted about 45 minutes long and was audio-recorded.  
13 Data were collected between February and April 2017.

14  
15  
16  
17  
18  
19 **Research team:** The corresponding author (EW) was a graduate student and not affiliated to  
20 the study sites. This provided confidence that the data obtained from the interviews were  
21 solely the participants' perceptions and not influenced by previous contact. Other authors had  
22 no previous contact with the study sites. EW is a data analyst, early career epidemiologist and  
23 implementation researcher. MA is a research scientist with interests in implementation  
24 science, health policy and systems strengthening research. EE is a health systems and policy  
25 as well as implementation researcher. LI is an associate professor in public health,  
26 demographer and implementation researcher. All authors are well versed in qualitative and  
27 quantitative methods.

28  
29  
30  
31  
32  
33  
34 **Data analysis:** Audio-recorded transcripts were transcribed verbatim. Inductive thematic  
35 analysis was conducted. Data verification for accuracy and completeness was done through  
36 reading and re-reading of the interview transcripts. Coding of the transcripts was done to  
37 identify keywords, messages, and patterns emerging from the data. The developed codes  
38 were matched to ensure integrity and similarity between the researchers. A codebook was  
39 developed after integration and collation of the identified codes. From the codebook, broader  
40 themes and sub-themes that emerged from the data were identified and reviewed to ensure  
41 they were appropriate for the interpretation (18). Some interview transcripts were shared with  
42 selected participants for cross-checking to enhance trustworthiness and validity of the data  
43 (19).

44  
45  
46  
47  
48  
49  
50 **Ethical considerations:** Participants were briefed of the study and their rights and provided  
51 with an information sheet. All participants signed an informed consent form prior to the  
52 interviews. Permission to access the selected health facilities was obtained from the  
53 management of the respective health facilities adhering to internal protocol.

## RESULTS

Eighteen health care providers from the CCC of the selected health care facilities participated in the in-depth interviews. Their demographic characteristics are presented in Table 1.

**Table 1 Demographic characteristics of health care providers who participated in in-depth interviews at selected HIV clinics in Nairobi County, Kenya**

| Variable                                   | Value             | Facility A | Facility B | Facility C | Total |
|--------------------------------------------|-------------------|------------|------------|------------|-------|
| Sex                                        | Males             | 5          | 1          | 1          | 7     |
|                                            | Females           | 3          | 4          | 4          | 11    |
| Job category                               | Clinical officers | 3          | 3          | 2          | 8     |
|                                            | Nurses            | 2          | 1          | 2          | 4     |
|                                            | Counsellors       | 2          | 1          | 1          | 4     |
|                                            | Pharmacists       | 1          | 1          | -          | 2     |
| Years of Experience in HIV/TB care (years) | < 1               | -          | -          | 2          | 2     |
|                                            | 2 – 4             | 1          | 1          | -          | 2     |
|                                            | > 4               | 7          | 5          | 2          | 14    |
| Age (years)                                | ≤ 30              | 1          | 2          | 1          | 4     |
|                                            | 31 – 40           | 5          | 3          | 2          | 10    |
|                                            | 41 – 50           | 1          | -          | -          | 1     |
|                                            | > 50              | 2          | -          | 1          | 3     |

### Factors affecting acceptability of IPT among health care providers

Although health care providers considered IPT to be an important intervention in provision of care for PLHIV, they indicated a number of concerns with IPT at different levels, which challenged their comfort, and satisfaction with the intervention. The factors are grouped and presented in the following categories: organizational factors, provider factors, patient level factors, innovation characteristics and structural level factors. The categories are adapted from constructs of the conceptual framework of multi-level factors affecting implementation outcomes by Chaudoir et al. (2013).

## 1. Organizational factors

Organisational factors encompass factors related to the organizational context where IPT is implemented, in this case the CCCs. These factors should facilitate providers to implement the IPT programme effectively.

### *Increased workload*

Most frontline providers complained of the high workload in the facility, which they felt negatively affected implementation of the IPT programme. Providers reported that the limited number of clinicians did not match the high volume of patients in the CCC. The procedures to be conducted on the patient before IPT initiation were also considered very long and hence a burden to a single clinician. Providers felt that more clinicians should be hired with some dedicated to IPT related activities in the CCCs.

*“...by the time you do all the screening for conditions like hepatitis, before even convincing the patient to start IPT... it is a big workload because we have many patients waiting in line to be served.” (Healthcare provider, Facility A)*

*“To comment about the environment and the working condition, here as a national referral, we have very high workload...then if you follow the standard operating procedures to give IPT, it will take you very long to complete all those investigations, examinations and what have you... ” (Health care provider, Facility A)*

### *Inconsistent Isoniazid drug supply*

Most of the healthcare providers also mentioned stock-out of Isoniazid medication and other supplies related to the IPT programme in the facilities. They reported stock-outs in the previous year and considered this as a factor that greatly affected IPT delivery. Some providers felt that the erratic stocks and poor supply of the medications indicated lack of support for the IPT programme among policymakers and management. This, in turn, negatively affected their perception, morale and delivery of the medication to the patients.

*“...We started the programme nicely, empowering patients, counselling them on IPT, and encouraging them to take IPT... and then all of a sudden from nowhere, IPT drugs are not available” (Health care provider, Facility C)*

*“My biggest challenge with the management [in CCC] is when there is erratic supply of IPT...So the patients were out of medication for some time and when you send them*

1  
2  
3 *out to buy them; of course it's not possible for them to get the drug..." (Health care*  
4 *provider, Facility B)*  
5

## 6 7 2. Innovation characteristics

8 Innovation factors relate to aspects of the intervention (innovation) being implemented (IPT)  
9 which enhance its successful implementation by the health care providers.  
10  
11

### 12 13 *Unclear IPT guidelines and standard operating procedures (SOPs)*

14 Most of the healthcare providers expressed discomfort with the IPT guidelines and SOPs  
15 citing lack of clarity, which affected their delivery of the intervention. Providers  
16 recommended a revision of the guidelines with specific regard to eligibility criteria and  
17 clarity on ruling-out active and latent TB before prescription; duration of IPT; and national  
18 consensus on IPT-related services as part of the HIV/TB collaborative activities since some  
19 of the services differed among facilities e.g. provision of IPT with pyridoxine (to prevent  
20 peripheral neuropathy) versus IPT alone and monthly versus three-monthly drug re-fills.  
21  
22

23  
24  
25  
26  
27 *"I think it [IPT] is a good idea but the problem is with the protocol, the SOPs. They*  
28 *are not very clear. They are not well documented..." (Health care provider, Facility*  
29 *A)*  
30  
31

32  
33 *"...They told us in the training that we should give IPT every month to the patient. We*  
34 *are not comfortable with it...we prefer every three months refill as we have been*  
35 *doing. May be they should re-evaluate these guidelines..." (Health care provider,*  
36 *Facility C)*  
37  
38  
39

### 40 *Long duration of IPT*

41 Health care providers largely expressed discomfort with the long duration of the IPT  
42 treatment regimen. They reported this to be a critical factor that influenced their delivery of  
43 the intervention mainly because of pill-burden and adverse effects reported by patients on  
44 IPT. Most respondents recommended a reduced duration of the drug with the help of suitable  
45 research.  
46  
47  
48  
49

50  
51 *"If I had a chance, I would give an IPT that would be taken once. Not the daily one*  
52 *for six months. That's a long time..." (Health care provider, Facility C)*  
53  
54  
55  
56  
57

### 3. Provider-related factors

Factors related to the health care providers themselves were considered to affect the perception and implementation of IPT in the clinics.

#### *Provider information and training on IPT*

Health care providers indicated that they needed to be empowered on the administration of IPT through additional information and training on IPT. Some of the providers cited limited or no specific training on IPT administration, which limited their ability to deliver the intervention. They recommended revision of guidelines and additional training on IPT, driven by policymakers as well as regular monitoring and reporting of IPT outcomes from research to guide implementation.

*“...Some of us have not been taken through training on IPT. It was just introduced and you are told, “give IPT for this duration”... So I feel we should have been taken through training to know more about the IPT even before rolling it out.” (Healthcare provider, Facility A)*

#### *Peer influence and perceptions on IPT*

Peer influence also affected the perception of health care providers about IPT. The satisfaction of other health care providers with the intervention influenced their colleagues in the CCCs. Negative perceptions or doubts about the intervention by some health care providers affected the perception and delivery of IPT by the fellow providers.

*“...Colleagues say that patients tell them “I’ve seen a friend of my husband who took [IPT]...”, you know. So that experience with my colleagues from the patients’ mouth talking.... in fact, part of it was the reason why this facility delayed as a hospital to start IPT.” (Healthcare provider, Facility B)*

### 4. Patient-related factors

Factors relating to the patients were thought to considerably affect health care providers’ perceptions and delivery of IPT.

#### *Non-adherence to IPT and IPT side effects on Patients*

Most health care providers reported non-adherence of their patients to IPT after initiation. Non-adherence was believed to be as a result of fear of side-effects and pill burden among the patients. Health care providers felt that development of side-effects in some patients after IPT affected adherence to IPT by other patients. Participants expressed concern that non-

1  
2  
3 adherence would eventually lead to development of resistance to isoniazid drugs in the long  
4 run causing multi-drug resistant (MDR-TB) or extensively drug-resistant TB (XDR-TB). Due  
5 to this, some providers reported basing their decision to deliver IPT on the immunological,  
6 virological and clinical state of the patients, while some considered the drug regimen of the  
7 patients. Ultimately, this influenced whether eligible patients were initiated or not.  
8 Respondents recommended considerations of patient clinical state and drug regimen and  
9 argued for these to be added to the IPT guidelines.  
10  
11  
12  
13

14  
15 *“...At least for them to do a research and find out if these side-effects are really*  
16 *associated with IPT. But if it is found to be safe to use, I would not have any other*  
17 *recommendations...Uptake reduced because they were not starting anyone else on*  
18 *IPT for fear of side-effects and death.” (Healthcare provider, Facility A)*  
19  
20  
21

#### 22 *Pill burden among patients*

23 Health care providers also felt that IPT increased the pill burden among the patients which  
24 affected patients' adherence to the medication. Patients complained of the difficulty in  
25 adhering to isoniazid drugs while some completely declined to take the medication due to  
26 high number of pills prescribed for PLHIV. As a result, providers recommended that a shorter  
27 duration formulation of IPT for the patients would help tackle this problem.  
28  
29  
30  
31

32  
33 *...“patients feel that these drugs are so many and some say they don't want to start*  
34 *these drugs together...” (Healthcare provider, Facility A)*  
35  
36

37 *“...if they can review the concentration now, then maybe find out the concentration*  
38 *that can still work and still be mild to the patients...because of the pill burden to these*  
39 *clients...” (Health care provider, Facility B)*  
40  
41

#### 42 *Inadequate patient information on IPT*

43 Information about the benefits and effects of IPT was reported to be limited among the  
44 patients. This resulted in rumours and misconceptions about IPT among the patients thus  
45 straining the IPT programme with patients refusing to be initiated or disposing of the  
46 medication even after being briefed. Providers expressed concern over the lack of consensus  
47 and support regarding patient education activities in the CCCs for IPT and recommended  
48 intervention from stakeholders and policymakers.  
49  
50  
51  
52  
53  
54  
55  
56  
57  
58  
59  
60

1  
2  
3 *“...We should conduct continuous medical education, information which should be*  
4 *given to the patient and how the information should be given...” (Healthcare*  
5 *provider, Facility A)*

6  
7  
8 *“I think they need to do more education to the people... actually, most clients decline*  
9 *because they have never heard about it...they would say ‘I am being treated for TB*  
10 *yet I don’t have TB signs’ ”... (Healthcare provider, Facility C)*

## 14 5. Structural factors

15 Structural factors relate to the wider policy environment as well as the physical and working  
16 environment of the healthcare providers.  
17

### 20 *Inadequate policymakers’ support in the IPT implementation*

21 Most of the providers cited limited commitment at policy level to ensuring effective  
22 implementation and streamlining of the IPT programme, which consequently demotivated  
23 them. Majority of the interviews were of the opinion that strong commitment and explicit  
24 support from the policy makers and programme managers for the IPT programme would be  
25 necessary for effective implementation of the programme. Areas of support identified include  
26 advocacy for IPT, improved supply of isoniazid drugs and proper monitoring and evaluation  
27 of the IPT.  
28

29  
30  
31  
32  
33  
34 *“...there is no initiative by those who are concerned in the TB programme. They need*  
35 *to make sure that they insist on IPT, and put some regulations or some rules to be*  
36 *followed to ensure IPT is given to every eligible patient...”(Healthcare provider,*  
37 *Facility A)*

38  
39  
40  
41  
42 *“The people concerned should be more involved in the programme. We are giving*  
43 *IPT but they are not fully engaged. We don’t get any feedback from them. They should*  
44 *monitor the supply of drugs and effects of IPT.” (Health care provider, Facility B)*

### 47 *Limited health care providers’ involvement in IPT guideline development*

48 Respondents also indicated that there was pressure from policymakers to implement the  
49 proposed IPT policy guidelines during their introduction or revision at the CCCs without  
50 provider involvement. This made them prescribe the intervention without actually being  
51 comfortable with its delivery.  
52  
53  
54

1  
2  
3 *“We were told these are the guidelines and we should follow...before they change the*  
4 *guidelines we should be involved...At the moment I don't feel like we are involved in*  
5 *this...” (Health care provider, Facility C)*  
6  
7  
8  
9

#### 10 *Poor integration of IPT-related services*

11 Some health care providers reported poor integration of IPT services in the clinic that  
12 affected the programme. They felt that clinical examinations required before IPT initiation  
13 should be performed in the same facility and the costs subsidized so that all patients undergo  
14 the tests to ascertain eligibility for IPT. They considered this a role of the management and  
15 policymakers to ensure that the IPT programme was effectively implemented.  
16  
17  
18  
19

20  
21 *“...if we do [all] the tests from here, it will take like 30 minutes to do everything*  
22 *and give the patient IPT. When they come again for check-ups, we can still do them*  
23 *again from here, and it takes less time and we get results in real time....it will even be*  
24 *faster for the patients” (Healthcare provider, Facility A)*  
25  
26  
27

28 The factors affecting IPT acceptability among healthcare providers in the selected facilities  
29 are summarised in a conceptual framework as shown in Appendix 2.  
30  
31  
32

## 33 **DISCUSSION**

34 This study assessed the factors associated with provider acceptability of IPT in selected  
35 clinics in Nairobi City County Kenya. We grouped these factors into five broad categories  
36 guided by previous literature viz. organisational, provider, patient, innovation and structural  
37 level factors. These constructs were in agreement with those presented in the literature (20).  
38  
39  
40  
41

42 Among these findings, inadequate high-level commitment and support for the IPT  
43 programme by higher programme managers and policymakers stood out as perhaps the  
44 biggest barrier to successful IPT implementation. Discussions with care providers reaffirmed  
45 previous findings that supportive supervision, consistent engagement of policy makers and  
46 higher-level supervisors with care providers as well as the depth of interaction between  
47 policymakers and practitioners remain crucial for effective IPT implementation. Indeed, poor  
48 monitoring and lack of supervision of the IPT programme by higher managers have been  
49 reported to influence IPT uptake in similar context (10, 21).  
50  
51  
52  
53  
54  
55  
56  
57  
58  
59  
60



1  
2  
3 Linked to high-level commitment and support is provider involvement in the formulation of  
4 policies and guidelines. The study found limited involvement of the health workers in the  
5 enactment and implementation of the IPT guidelines. As a result, most respondents did not  
6 own the guidelines or were generally uncomfortable implementing them. Since only a few  
7 had received training and/or support in its implementation, they saw it as a challenge rather  
8 than an opportunity to improve the health of their clients, resulting in the healthcare providers  
9 feeling pressured by policymakers into IPT delivery. The lack of ownership of IPT  
10 among providers because of inadequate engagement at formulation stage is not surprising and  
11 reflects evidence in this area that suggest successful implementation and compliance with  
12 such initiatives require mechanisms that help enforce official guidelines, address capacity  
13 gaps, and enhance public awareness (22).  
14  
15  
16  
17  
18  
19  
20  
21  
22

23 However, lack of involvement in the development of the IPT guidelines was not the only  
24 factor that made providers uncomfortable implementing the guidelines: the nature of an  
25 intervention itself, (IPT in this case), have been shown to affect implementation outcomes  
26 (20, 23). In the case of this study, IPT intervention-related factors greatly influenced the  
27 acceptability of IPT among care providers. The lack of clarity on some of the provisions of  
28 the guidelines hindered the effectiveness and thus acceptability of the intervention by the  
29 providers in the clinics surveyed. This finding resonates with evidence from other studies (21,  
30 24), and echoes the need for a well-planned engagement process with care givers whenever  
31 such guidelines are being developed and the need to make these as simple as possible.  
32  
33  
34  
35  
36  
37

38 Similarly, better integration of IPT-related services at the clinics could significantly improve  
39 the delivery of IPT in the study clinics. Integration could entail amalgamating all or most of  
40 the IPT-related procedures in one room/space. This can reduce challenges such as loss-to-  
41 follow-up in TB/HIV treatment, health worker and patient movements within the clinic.  
42 Ultimately, this would lessen provider workload. Lack of coordination between TB and HIV  
43 activities has been reported as a barrier to IPT implementation elsewhere (21). In another  
44 study indicated that performing reading and interpreting TSTs in the context of busy HIV  
45 clinics was a challenge for both patients and staff, negatively affecting the implementation of  
46 the IPT programme (25).  
47  
48  
49  
50  
51  
52

53 Moreover, health providers questioned the efficacy of Kenya's IPT approach to identifying  
54 latent TB considering the Kenyan IPT guidelines recommend a symptomatic algorithm and  
55  
56  
57

1  
2  
3 no Tuberculin Skin Test (TST) for IPT eligibility. Care providers have previously called for  
4 clarity of guidelines (25). Perhaps, this explains the lack of awareness among some providers  
5 of the benefits of IPT in some LMIC (21). Investigation of optimal duration, safety and  
6 efficacy of IPT and its role in reducing TB risk, particularly under programme conditions has  
7 been strongly recommended by the WHO, Stop TB plan (26).  
8  
9

10  
11 Previous studies have hypothesised that provider-level factors could predict implementation  
12 outcomes (23, 27). In our study, provider-related factors such as limited information and  
13 inadequate empowerment on IPT influenced acceptability of IPT, confirming similar findings  
14 in South Africa where lack of knowledge and experience with IPT were reported to be the  
15 primary barriers to IPT implementation (21). A similar study noted that inadequate training  
16 and lack of guidelines influenced IPT implementation in Ethiopia (10). It is therefore  
17 important that provider training and information is prioritised by the health system before  
18 implementation to achieve the desired outcomes (28). Additionally, technical assistance  
19 during implementation including retraining of the providers, training new staff, emotional  
20 support, and mechanisms to promote local problem solving is critical for the IPT intervention  
21 (27).  
22  
23  
24  
25  
26  
27  
28  
29

30 Patient-level predictors explain meaningful variance in implementation outcomes and are  
31 considered important factors that should be measured when assessing the implementation of  
32 interventions (20). This study identified poor adherence and pill burden among patients as  
33 key barriers to IPT acceptance among providers and patients. Adherence to IPT treatment is a  
34 critical factor that needs consideration when scaling treatment services in developing  
35 countries. Even though we used an exploratory approach to investigate IPT acceptance  
36 among providers, the providers reporting fear of isoniazid drug-resistance among patients  
37 should be cause for concern. This is particularly so because of the gradual increase in drug-  
38 resistant TB cases in Kenya (from 112 to 1300 in 2016) (29). Policymakers, health care  
39 providers and practitioners have questioned the implications of poor IPT adherence to drug-  
40 resistant TB disease especially in the case of long course INH mono-therapy (30, 31). To  
41 improve information on IPT among patients in order to boost uptake and thus enhance IPT  
42 effectiveness, national advocacy and patient empowerment through information provision is  
43 needed, among other interventions. The Global Plan to Stop TB has also recommended the  
44 investigation of implementation of IPT recommended policies on the proportion of PLHIV  
45 who develop TB disease and mortality (12).  
46  
47  
48  
49  
50  
51  
52  
53  
54  
55  
56  
57  
58  
59  
60

1  
2  
3 In the organizational context, heavy workload on health care providers and isoniazid stock-  
4 outs in the HIV clinics discouraged providers from initiating patients into IPT fearing for lack  
5 of drug adherence and associated side effects. Heavy workload among providers can often  
6 result in compromised quality and should be addressed as part of organisational context  
7 reforms to support IPT. In our study, this could be explained by the fact that the study clinics  
8 served a large population catchment area and not necessarily because the quality offered  
9 attracted patients to the clinics. Another reason for the heavy workload was inadequate  
10 staffing especially with regards to IPT trained staff. Ultimately, both factors risked the quality  
11 of care IPT patients received.  
12  
13  
14  
15  
16  
17

### 18 **Strengths and Limitations**

19 This study, to our knowledge, is among the first to assess the factors influencing the  
20 acceptability of IPT among health care providers in selected HIV clinics in Nairobi County,  
21 Kenya. The adaptation of existing theory and literature to guide the study enabled the  
22 collection of exhaustive context-specific information at different levels of the health system.  
23 The inclusion of both clinical and non-clinical personnel as key-informants in the interviews  
24 enabled the collection of information at different levels and cadres of health service provision  
25 thereby enhancing validity of the data. This study adhered to consolidated criteria for  
26 reporting qualitative research (COREQ).  
27  
28  
29  
30  
31  
32

33 Purposive selection of the health facilities may limit the generalizability of the findings from  
34 this study to other HIV clinics in Nairobi County. However, the study was context-specific  
35 and the aim was to elicit in-depth information on IPT acceptability in this context, which may  
36 inform health service provision and policy in health systems of similar context.  
37  
38  
39  
40

41 Finally, the study was conducted among city hospitals, which are presumably better  
42 resourced as compared to those in other locations. Therefore, the IPT programme was  
43 expected to be better managed as opposed to other non-city HIV clinics. This could  
44 contribute to better acceptability of IPT among the providers whose concerns may not  
45 entirely reflect that of health care providers in other clinics in Nairobi County. Further studies  
46 aiming for generalizability should control for the tier of health facilities in their assessment of  
47 IPT acceptability.  
48  
49  
50  
51  
52

### 53 **Conclusion**

54 The study gives insight of the complexity of factors affecting IPT implementation and the  
55 value of qualitative methods and guiding frameworks to elucidate these factors. The  
56  
57  
58  
59  
60

1  
2  
3 acceptability of IPT in this context was influenced by factors at different levels namely:  
4 organizational level, provider level, patient level, innovation characteristics and structural  
5 level factors. Ensuring optimal acceptability of IPT among health care providers will require  
6 expanded depth of engagement with both providers and patients, and on-the-job design  
7 specific actions to support providers in implementation.  
8  
9  
10

### 11 **Acknowledgements**

12 We acknowledge the collaboration of the Division of Epidemiology and biostatistics, School  
13 of Public Health, Faculty of Health Sciences at the University of the Witwatersrand,  
14 Johannesburg, South Africa. The authors of the study are also grateful to the management and  
15 staff at comprehensive care centres of the selected health facilities for their cooperation and  
16 support during the study.  
17  
18  
19  
20  
21

22 **Funding:** This work was supported by a postgraduate training scholarship from the TDR, the  
23 Special Program for Research and Training in Tropical Diseases, at the World Health  
24 Organization (WHO) in Geneva, Switzerland. The content is solely the responsibility of the  
25 authors and does not necessarily represent the official views of the TDR or WHO.  
26  
27  
28

29 **Data sharing statement:** No additional data are available.

30 **Competing interests:** The authors declare that they do not have any competing interests.

31  
32 **Ethics approval:** Study approval and ethical clearance to conduct the research was obtained  
33 from the University of the Witwatersrand Human Research Ethics Committee (HREC)  
34 (approval No. M161164), The Kenyatta National Hospital-University of Nairobi Ethics and  
35 Research Committee (approval No. P11/01/2017) and the Kenya Medical Research Institute  
36 Ethics and Research Committee (approval No. RES/7/3/1). A research permit was obtained  
37 from the National Commission for Science, Technology and Innovation (NACOSTI) to  
38 conduct the study in Nairobi County, Kenya.  
39  
40  
41  
42  
43

44 **Patient consent:** Not required as study participants were health care providers.

45  
46 **Author contributions:** EW, MA, and LI contributed to the conceptualization and design of  
47 the study including the development of the study tools. EW collected the data and did initial  
48 analysis and drafts of the manuscript. EE, MA and LI contributed to the data analysis,  
49 manuscript writing and editing. All authors read and approved the final version of the  
50 manuscript.  
51  
52  
53  
54  
55  
56  
57  
58  
59  
60

## REFERENCES

1. World Health Organization. Global Tuberculosis Report 2016. Geneva, Switzerland 2016.
2. World Health organization. Global Tuberculosis Report 2015. Geneva, Switzerland; 2015.
3. Sharma S, Mohan A, Kadhiravan T. HIV-TB co-infection: epidemiology, diagnosis & management. *The Indian journal of medical research*. 2005;121(4):550-67.
4. Pawlowski A, Jansson M, Sköld M, et al. Tuberculosis and HIV co-infection. *PLoS pathogens*. 2012;8(2):e1002464.
5. World Health Organization. Use of high burden country lists for TB by WHO in the post-2015 era. Geneva, Switzerland; 2015.
6. National Tuberculosis Leprosy and Lung Disease Program (NTLD-P). Annual Report 2015. 2015.
7. World Health Organization. WHO policy on collaborative TB/HIV activities: Guidelines for national programmes and other stakeholders. Geneva, Switzerland; 2012.
8. World Health Organization. INTERIM POLICY ON COLLABORATIVE HIV/TB ACTIVITIES. Geneva, Switzerland; 2004.
9. World Health Organization. WHO THREE I's MEETING: Intensified Case Finding (ICF), Isoniazid Preventive Therapy (IPT) and TB Infection Control (IC) for people living with HIV. Geneva, Switzerland; 2008.
10. Teklay G, Teklu T, Legesse B, et al. Barriers in the implementation of isoniazid preventive therapy for people living with HIV in Northern Ethiopia: a mixed quantitative and qualitative study. *BMC Public Health*. 2016;16(1):840.
11. World Health Organization. Recommendation on 36 months isoniazid preventive therapy to adults and adolescents living with HIV in resource-constrained and high TB- and HIV-prevalence settings. Geneva, Switzerland; 2015.
12. World Health Organization. Guidelines for intensified tuberculosis case-finding and isoniazid preventive therapy for people living with HIV in resource-constrained settings. Geneva, Switzerland; 2011.
13. National Tuberculosis Leprosy and Lung Disease Program (NTLD-P). Isoniazid Preventive Therapy Kenya 2016. Available from: <https://www.nntp.co.ke/2016/05/26/1545-2/> (Accessed November 2017).
14. Proctor E, Silmere H, Raghavan R, et al. Outcomes for Implementation Research: Conceptual Distinctions, Measurement Challenges, and Research Agenda. *Administration and Policy in Mental Health and Mental Health Services Research*. 2011;38(2):65-76.
15. Peters DH, Adam T, Alonge O, et al. Implementation research: what it is and how to do it. *BMJ*. 2013;347.
16. Tong A, Sainsbury P, Craig J. Consolidated criteria for reporting qualitative research (COREQ): a 32-item checklist for interviews and focus groups. *International Journal for Quality in Health Care*. 2007;19(6):349-57.
17. Kenya National Bureau of Statistics. The 2009 Kenya Population and Housing Census: Population Distribution by Age, Sex and Administrative Units. Kenya; 2010.
18. Braun V, Clarke V. Using thematic analysis in psychology. *Qualitative research in psychology*. 2006;3(2):77-101.
19. Mays N, Pope C. Qualitative research in health care: Assessing quality in qualitative research. *BMJ: British Medical Journal*. 2000;320(7226):50.
20. Chaudoir SR, Dugan AG, Barr CH. Measuring factors affecting implementation of health innovations: a systematic review of structural, organizational, provider, patient, and innovation level measures. *Implementation Science*. 2013;8(1):22.

- 1
- 2
- 3 21. Lester R, Hamilton R, Charalambous S, et al. Barriers to implementation of isoniazid
- 4 preventive therapy in HIV clinics: a qualitative study. *Aids*. 2010;24 Suppl 5:S45-8.
- 5 22. Atela M, Bakibinga P, Ettarh R, et al. Strengthening health system governance using
- 6 health facility service charters: a mixed methods assessment of community experiences and
- 7 perceptions in a district in Kenya. *BMC health services research*. 2015;15(1):539.
- 8 23. Damschroder LJ, Aron DC, Keith RE, et al. Fostering implementation of health
- 9 services research findings into practice: a consolidated framework for advancing
- 10 implementation science. *Implementation Science*. 2009;4(1):50.
- 11 24. Makoni A, Chemhuru M, Tshimanga M, et al. Evaluation of the isoniazid preventive
- 12 therapy (IPT) program in Shurugwi District, Midlands Province, Zimbabwe, January 2013 to
- 13 August 2014. *BMC Res Notes*. 2015;8:476.
- 14 25. Ait-Khaled N, Alarcon E, Bissell K, et al. Isoniazid preventive therapy for people
- 15 living with HIV: public health challenges and implementation issues. *The international*
- 16 *journal of tuberculosis and lung disease : the official journal of the International Union*
- 17 *against Tuberculosis and Lung Disease*. 2009;13(8):927-35.
- 18 26. World Health Organization. The Global Plan to Stop TB 2011 - 2015. 2011.
- 19 27. Durlak JA, DuPre EP. Implementation matters: A review of research on the influence
- 20 of implementation on program outcomes and the factors affecting implementation. *American*
- 21 *journal of community psychology*. 2008;41(3-4):327-50.
- 22 28. Wandersman A, Duffy J, Flaspohler P, Noonan R, Lubell K, Stillman L, et al.
- 23 Bridging the Gap Between Prevention Research and Practice: The Interactive Systems
- 24 Framework for Dissemination and Implementation. *American Journal of Community*
- 25 *Psychology*. 2008;41(3):171-81.
- 26 29. World Health Organization. Kenya Tuberculosis Profile. Geneva, Switzerland; 2016.
- 27 30. Volmink J, Woldehanna S. Treatment of latent tuberculosis infection in HIV infected
- 28 persons. *Cochrane Database Syst Rev*. 2004;1.
- 29 31. Date AA, Vitoria M, Granich R, Banda M, Fox MY, Gilks C. Implementation of co-
- 30 trimoxazole prophylaxis and isoniazid preventive therapy for people living with HIV.
- 31 *Bulletin of the World Health Organization*. 2010;88(4):253-9.
- 32
- 33
- 34
- 35
- 36
- 37
- 38
- 39
- 40
- 41
- 42
- 43
- 44
- 45
- 46
- 47
- 48
- 49
- 50
- 51
- 52
- 53
- 54
- 55
- 56
- 57
- 58
- 59
- 60

1  
2  
3  
4  
5  
6  
7  
8  
9  
10  
11  
12  
13  
14  
15  
16  
17  
18  
19  
20  
21  
22  
23  
24  
25  
26  
27  
28  
29  
30  
31  
32  
33  
34  
35  
36  
37  
38  
39  
40  
41  
42  
43  
44  
45  
46  
47  
48  
49  
50  
51  
52  
53  
54  
55  
56  
57  
58  
59  
60

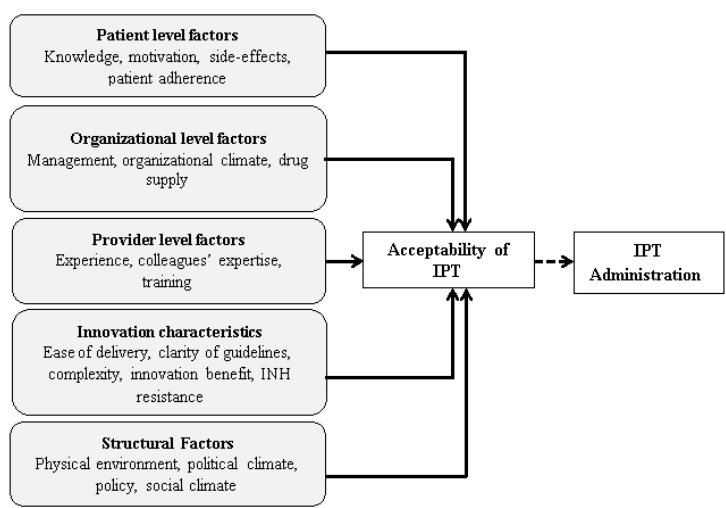

Conceptual framework of factors affecting acceptability of IPT among health care providers. Adapted from Chaudoir et al. (2013)

215x279mm (96 x 96 DPI)

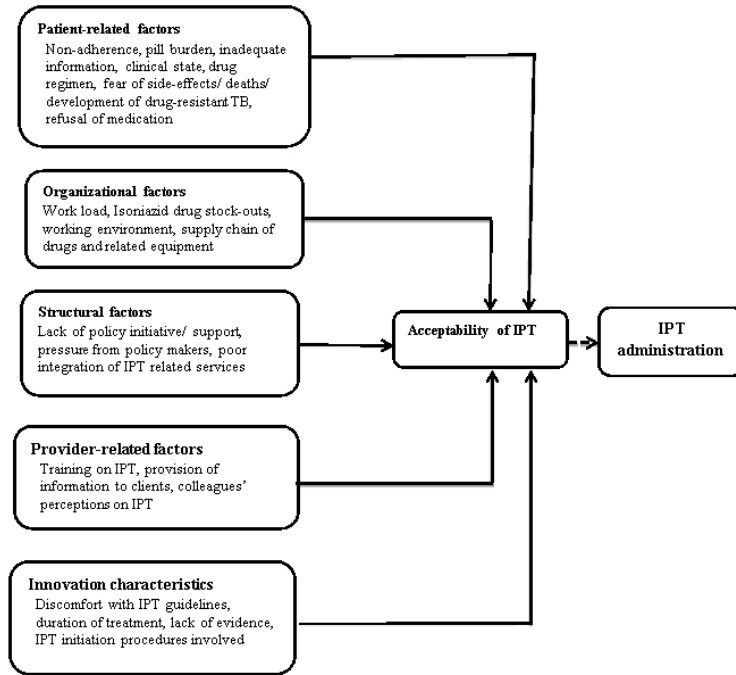

Conceptual framework of factors influencing the acceptability of IPT among health care providers in selected HIV clinics in Nairobi County, Kenya

215x279mm (96 x 96 DPI)



# Reporting checklist for qualitative study.

Based on the SRQR guidelines.

## Instructions to authors

Complete this checklist by entering the page numbers from your manuscript where readers will find each of the items listed below.

Your article may not currently address all the items on the checklist. Please modify your text to include the missing information. If you are certain that an item does not apply, please write "n/a" and provide a short explanation.

Upload your completed checklist as an extra file when you submit to a journal.

In your methods section, say that you used the SRQR reporting guidelines, and cite them as:

O'Brien BC, Harris IB, Beckman TJ, Reed DA, Cook DA. Standards for reporting qualitative research: a synthesis of recommendations. *Acad Med.* 2014;89(9):1245-1251.

|                                            | Reporting Item                                                                                                                                                                                                                          | Page Number |
|--------------------------------------------|-----------------------------------------------------------------------------------------------------------------------------------------------------------------------------------------------------------------------------------------|-------------|
|                                            | #1 Concise description of the nature and topic of the study identifying the study as qualitative or indicating the approach (e.g. ethnography, grounded theory) or data collection methods (e.g. interview, focus group) is recommended | 1           |
|                                            | #2 Summary of the key elements of the study using the abstract format of the intended publication; typically includes background, purpose, methods, results and conclusions                                                             | 2           |
| Problem formulation                        | #3 Description and significance of the problem / phenomenon studied: review of relevant theory and empirical work; problem statement                                                                                                    | 4,5         |
| Purpose or research question               | #4 Purpose of the study and specific objectives or questions                                                                                                                                                                            | 5           |
| Qualitative approach and research paradigm | #5 Qualitative approach (e.g. ethnography, grounded theory, case study, phenomenology, narrative research) and                                                                                                                          | 6           |

1 guiding theory if appropriate; identifying the research  
 2 paradigm (e.g. postpositivist, constructivist / interpretivist)  
 3 is also recommended; rationale. The rationale should  
 4 briefly discuss the justification for choosing that theory,  
 5 approach, method or technique rather than other options  
 6 available; the assumptions and limitations implicit in  
 7 those choices and how those choices influence study  
 8 conclusions and transferability. As appropriate the  
 9 rationale for several items might be discussed together.  
 10  
 11  
 12  
 13

|    |                           |     |                                                              |   |
|----|---------------------------|-----|--------------------------------------------------------------|---|
| 14 | Researcher                | #6  | Researchers' characteristics that may influence the          | 7 |
| 15 | characteristics and       |     | research, including personal attributes, qualifications /    |   |
| 16 | reflexivity               |     | experience, relationship with participants, assumptions      |   |
| 17 |                           |     | and / or presuppositions; potential or actual interaction    |   |
| 18 |                           |     | between researchers' characteristics and the research        |   |
| 19 |                           |     | questions, approach, methods, results and / or               |   |
| 20 |                           |     | transferability                                              |   |
| 21 |                           |     |                                                              |   |
| 22 |                           |     |                                                              |   |
| 23 |                           |     |                                                              |   |
| 24 |                           |     |                                                              |   |
| 25 | Context                   | #7  | Setting / site and salient contextual factors; rationale     | 6 |
| 26 |                           |     |                                                              |   |
| 27 |                           |     |                                                              |   |
| 28 | Sampling strategy         | #8  | How and why research participants, documents, or             | 6 |
| 29 |                           |     | events were selected; criteria for deciding when no          |   |
| 30 |                           |     | further sampling was necessary (e.g. sampling                |   |
| 31 |                           |     | saturation); rationale                                       |   |
| 32 |                           |     |                                                              |   |
| 33 |                           |     |                                                              |   |
| 34 |                           |     |                                                              |   |
| 35 | Ethical issues pertaining | #9  | Documentation of approval by an appropriate ethics           | 7 |
| 36 | to human subjects         |     | review board and participant consent, or explanation for     |   |
| 37 |                           |     | lack thereof; other confidentiality and data security issues |   |
| 38 |                           |     |                                                              |   |
| 39 |                           |     |                                                              |   |
| 40 | Data collection methods   | #10 | Types of data collected; details of data collection          | 7 |
| 41 |                           |     | procedures including (as appropriate) start and stop         |   |
| 42 |                           |     | dates of data collection and analysis, iterative process,    |   |
| 43 |                           |     | triangulation of sources / methods, and modification of      |   |
| 44 |                           |     | procedures in response to evolving study findings;           |   |
| 45 |                           |     | rationale                                                    |   |
| 46 |                           |     |                                                              |   |
| 47 |                           |     |                                                              |   |
| 48 |                           |     |                                                              |   |
| 49 |                           |     |                                                              |   |
| 50 | Data collection           | #11 | Description of instruments (e.g. interview guides,           | 7 |
| 51 | instruments and           |     | questionnaires) and devices (e.g. audio recorders) used      |   |
| 52 | technologies              |     | for data collection; if / how the instruments(s) changed     |   |
| 53 |                           |     | over the course of the study                                 |   |
| 54 |                           |     |                                                              |   |
| 55 |                           |     |                                                              |   |
| 56 |                           |     |                                                              |   |
| 57 | Units of study            | #12 | Number and relevant characteristics of participants,         | 6 |
| 58 |                           |     | documents, or events included in the study; level of         |   |
| 59 |                           |     |                                                              |   |
| 60 |                           |     |                                                              |   |

participation (could be reported in results)

|    |                                                                                              |     |                                                                                                                                                                                                                                                                                                          |       |
|----|----------------------------------------------------------------------------------------------|-----|----------------------------------------------------------------------------------------------------------------------------------------------------------------------------------------------------------------------------------------------------------------------------------------------------------|-------|
| 1  |                                                                                              |     |                                                                                                                                                                                                                                                                                                          |       |
| 2  |                                                                                              |     |                                                                                                                                                                                                                                                                                                          |       |
| 3  | Data processing                                                                              | #13 | Methods for processing data prior to and during analysis, including transcription, data entry, data management and security, verification of data integrity, data coding, and anonymisation / deidentification of excerpts                                                                               | 7     |
| 4  |                                                                                              |     |                                                                                                                                                                                                                                                                                                          |       |
| 5  |                                                                                              |     |                                                                                                                                                                                                                                                                                                          |       |
| 6  |                                                                                              |     |                                                                                                                                                                                                                                                                                                          |       |
| 7  |                                                                                              |     |                                                                                                                                                                                                                                                                                                          |       |
| 8  |                                                                                              |     |                                                                                                                                                                                                                                                                                                          |       |
| 9  | Data analysis                                                                                | #14 | Process by which inferences, themes, etc. were identified and developed, including the researchers involved in data analysis; usually references a specific paradigm or approach; rationale                                                                                                              | 7     |
| 10 |                                                                                              |     |                                                                                                                                                                                                                                                                                                          |       |
| 11 |                                                                                              |     |                                                                                                                                                                                                                                                                                                          |       |
| 12 |                                                                                              |     |                                                                                                                                                                                                                                                                                                          |       |
| 13 |                                                                                              |     |                                                                                                                                                                                                                                                                                                          |       |
| 14 |                                                                                              |     |                                                                                                                                                                                                                                                                                                          |       |
| 15 |                                                                                              |     |                                                                                                                                                                                                                                                                                                          |       |
| 16 | Techniques to enhance trustworthiness                                                        | #15 | Techniques to enhance trustworthiness and credibility of data analysis (e.g. member checking, audit trail, triangulation); rationale                                                                                                                                                                     | 7     |
| 17 |                                                                                              |     |                                                                                                                                                                                                                                                                                                          |       |
| 18 |                                                                                              |     |                                                                                                                                                                                                                                                                                                          |       |
| 19 |                                                                                              |     |                                                                                                                                                                                                                                                                                                          |       |
| 20 |                                                                                              |     |                                                                                                                                                                                                                                                                                                          |       |
| 21 | Syntheses and interpretation                                                                 | #16 | Main findings (e.g. interpretations, inferences, and themes); might include development of a theory or model, or integration with prior research or theory                                                                                                                                               | 8-14  |
| 22 |                                                                                              |     |                                                                                                                                                                                                                                                                                                          |       |
| 23 |                                                                                              |     |                                                                                                                                                                                                                                                                                                          |       |
| 24 |                                                                                              |     |                                                                                                                                                                                                                                                                                                          |       |
| 25 |                                                                                              |     |                                                                                                                                                                                                                                                                                                          |       |
| 26 |                                                                                              |     |                                                                                                                                                                                                                                                                                                          |       |
| 27 | Links to empirical data                                                                      | #17 | Evidence (e.g. quotes, field notes, text excerpts, photographs) to substantiate analytic findings                                                                                                                                                                                                        | 8-14  |
| 28 |                                                                                              |     |                                                                                                                                                                                                                                                                                                          |       |
| 29 |                                                                                              |     |                                                                                                                                                                                                                                                                                                          |       |
| 30 |                                                                                              |     |                                                                                                                                                                                                                                                                                                          |       |
| 31 | Intergration with prior work, implications, transferability and contribution(s) to the field | #18 | Short summary of main findings; explanation of how findings and conclusions connect to, support, elaborate on, or challenge conclusions of earlier scholarship; discussion of scope of application / generalizability; identification of unique contributions(s) to scholarship in a discipline or field | 14-17 |
| 32 |                                                                                              |     |                                                                                                                                                                                                                                                                                                          |       |
| 33 |                                                                                              |     |                                                                                                                                                                                                                                                                                                          |       |
| 34 |                                                                                              |     |                                                                                                                                                                                                                                                                                                          |       |
| 35 |                                                                                              |     |                                                                                                                                                                                                                                                                                                          |       |
| 36 |                                                                                              |     |                                                                                                                                                                                                                                                                                                          |       |
| 37 |                                                                                              |     |                                                                                                                                                                                                                                                                                                          |       |
| 38 |                                                                                              |     |                                                                                                                                                                                                                                                                                                          |       |
| 39 |                                                                                              |     |                                                                                                                                                                                                                                                                                                          |       |
| 40 | Limitations                                                                                  | #19 | Trustworthiness and limitations of findings                                                                                                                                                                                                                                                              | 17    |
| 41 |                                                                                              |     |                                                                                                                                                                                                                                                                                                          |       |
| 42 |                                                                                              |     |                                                                                                                                                                                                                                                                                                          |       |
| 43 | Conflicts of interest                                                                        | #20 | Potential sources of influence of perceived influence on study conduct and conclusions; how these were managed                                                                                                                                                                                           | 18    |
| 44 |                                                                                              |     |                                                                                                                                                                                                                                                                                                          |       |
| 45 |                                                                                              |     |                                                                                                                                                                                                                                                                                                          |       |
| 46 |                                                                                              |     |                                                                                                                                                                                                                                                                                                          |       |
| 47 |                                                                                              |     |                                                                                                                                                                                                                                                                                                          |       |
| 48 | Funding                                                                                      | #21 | Sources of funding and other support; role of funders in data collection, interpretation and reporting                                                                                                                                                                                                   | 18    |
| 49 |                                                                                              |     |                                                                                                                                                                                                                                                                                                          |       |
| 50 |                                                                                              |     |                                                                                                                                                                                                                                                                                                          |       |
| 51 |                                                                                              |     |                                                                                                                                                                                                                                                                                                          |       |

The SRQR checklist is distributed with permission of Wolters Kluwer © 2014 by the Association of American Medical Colleges. This checklist was completed on 18. May 2018 using <http://www.goodreports.org/>, a tool made by the [EQUATOR Network](#) in collaboration with [Penelope.ai](#)

# BMJ Open

## Factors affecting the acceptability of isoniazid preventive therapy among health care providers in selected HIV clinics in Nairobi County, Kenya: A qualitative study

|                                 |                                                                                                                                                                                                                                                                                                                                                                                                                                                                                                                                     |
|---------------------------------|-------------------------------------------------------------------------------------------------------------------------------------------------------------------------------------------------------------------------------------------------------------------------------------------------------------------------------------------------------------------------------------------------------------------------------------------------------------------------------------------------------------------------------------|
| Journal:                        | <i>BMJ Open</i>                                                                                                                                                                                                                                                                                                                                                                                                                                                                                                                     |
| Manuscript ID                   | bmjopen-2018-024286.R1                                                                                                                                                                                                                                                                                                                                                                                                                                                                                                              |
| Article Type:                   | Research                                                                                                                                                                                                                                                                                                                                                                                                                                                                                                                            |
| Date Submitted by the Author:   | 31-Aug-2018                                                                                                                                                                                                                                                                                                                                                                                                                                                                                                                         |
| Complete List of Authors:       | Wambiya, Elvis; African Population and Health Research Center, Research; University of the Witwatersrand, School of Public Health Atela, Martin; Partnership for African Social and Governance Research, Research<br>Eboime, Ejemai; University of the Witwatersrand Centre for Health Policy, Public Health; National Primary Health Care Development Agency, Planning, Research and Statistics<br>Ibisomi, Latifat; University of Witwatersrand, School of Public Health; Nigerian Institute of Medical Research (NIMR), Research |
| <b>Primary Subject Heading</b>: | Infectious diseases                                                                                                                                                                                                                                                                                                                                                                                                                                                                                                                 |
| Secondary Subject Heading:      | HIV/AIDS, Qualitative research, Public health                                                                                                                                                                                                                                                                                                                                                                                                                                                                                       |
| Keywords:                       | HIV & AIDS < INFECTIOUS DISEASES, Tuberculosis < INFECTIOUS DISEASES, QUALITATIVE RESEARCH, Public health < INFECTIOUS DISEASES                                                                                                                                                                                                                                                                                                                                                                                                     |
|                                 |                                                                                                                                                                                                                                                                                                                                                                                                                                                                                                                                     |

SCHOLARONE™  
Manuscripts

1  
2  
3 **Factors affecting the acceptability of isoniazid preventive therapy among health care providers**  
4 **in selected HIV clinics in Nairobi County, Kenya: A qualitative study**  
5

6 **Corresponding author:** Mr. Elvis Omondi Achach Wambiya, P.O. Box 205 – 00242,  
7 Kitengela, Kenya, Email: [eowambiya@gmail.com](mailto:eowambiya@gmail.com). Telephone: +254797184545  
8

9 Dr. Martin Atela, Partnership for African Social and Governance Research, 2<sup>nd</sup> Ngong  
10 Avenue, Upper Hill, Nairobi; College of Health Sciences, University of Nairobi, PO Box  
11 53542 - 00200 Nairobi, Kenya. Email: [m.atelah@googlemail.com](mailto:m.atelah@googlemail.com), Telephone:  
12 +254733280413  
13

14 Dr. Ejemai Eboreime, University of the Witwatersrand, School of Public Health, Centre for  
15 Health Policy, Johannesburg, South Africa; National Primary Health Care Development  
16 Agency, Department of Planning Research & Statistics Abuja, Nigeria, 1 Jan Smuts Avenue,  
17 Braamfontein, Johannesburg, 2000, South Africa, Email: [ejemai.eboreime@wits.ac.za](mailto:ejemai.eboreime@wits.ac.za),  
18 Telephone: +2347035763597  
19

20  
21 Prof. Latifat Ibisomi, University of the Witwatersrand, School of Public Health, Division of  
22 Epidemiology and Biostatistics; Nigerian Institute of Medical Research (NIMR), Lagos  
23 Nigeria. 1 Jan Smuts Avenue, Braamfontein, Johannesburg, 2000, South Africa. Email:  
24 [Latifat.Ibisomi@wits.ac.za](mailto:Latifat.Ibisomi@wits.ac.za). Telephone: +27 (0) 11 717 2607  
25

26  
27 Word count: 5445  
28  
29  
30  
31  
32  
33  
34  
35  
36  
37  
38  
39  
40  
41  
42  
43  
44  
45  
46  
47  
48  
49  
50  
51  
52  
53  
54  
55  
56  
57  
58  
59  
60

**Research question**

What are the factors affecting the acceptability of isoniazid preventive therapy among health care providers in selected HIV clinics in Nairobi County, Kenya?

**ABSTRACT****Objective**

Despite being globally recommended as an effective intervention in tuberculosis (TB) prevention among people living with HIV (PLHIV), Isoniazid preventive therapy (IPT) implementation remains sub-optimal, especially in sub-Saharan Africa. This study explored the factors influencing the acceptability of IPT among health care providers in selected HIV clinics in Nairobi County, Kenya, a high HIV/TB burden country.

**Design**

A qualitative study was conducted using in-depth interviews with health care providers in selected HIV clinics. All conversations were audio-recorded, transcribed verbatim and analysed using a thematic approach.

**Setting**

The study was conducted in the HIV clinics of three purposefully selected public health care facilities in Nairobi County, Kenya between February 2017 and April 2017.

**Participants**

Eighteen purposefully selected health care providers (clinicians, nurses, pharmacists and counsellors) working in the HIV clinics participated in the study.

**Results**

Provider acceptability of IPT was influenced by factors relating to the organizational context, provider training on IPT and their perception on its efficacy, length and clarity of IPT guidelines and standard operation procedures, as well as structural factors (policy, physical and work environment). Inadequate high-level commitment and support for the IPT programme by programme managers and policymakers were found to be the major barriers to successful IPT implementation in our study context.

**Conclusion**

This study provides insight into the complexity of factors affecting IPT implementation in Kenya. Ensuring optimal acceptability of IPT among health care providers will require expanded depth of engagement by policy makers and IPT programme managers with both providers and patients, as well as on-the-job design specific actions to support providers in implementation. Such high-level commitment and support is consequently essential for quality delivery of the intervention.

1  
2  
3  
4  
5  
6  
7  
8  
9  
10  
11  
12  
13  
14  
15  
16  
17  
18  
19  
20  
21  
22  
23  
24  
25  
26  
27  
28  
29  
30  
31  
32  
33  
34  
35  
36  
37  
38  
39  
40  
41  
42  
43  
44  
45  
46  
47  
48  
49  
50  
51  
52  
53  
54  
55  
56  
57  
58  
59  
60

**Key Words:** Acceptability, Isoniazid, Comprehensive care centre, health care provider, HIV/TB

For peer review only

## Article Summary:

### Strengths and Limitations of this study

- To our knowledge, this is among the first qualitative studies exploring factors influencing the acceptability of Isoniazid Preventive Therapy among health care providers in the context of HIV clinics providing integrated HIV and TB services.
- The inclusion of both clinical and non-clinical health care providers in the study enabled the collection of information at different levels and cadres of health service provision thereby enhancing the breadth and validity of the information obtained.
- The adaptation of existing theory and literature to guide the study enabled the collection of context-specific information at different levels of the health system.
- Purposive selection of the health facilities included in the study may limit the generalisability of our findings beyond the study context. However, the conclusions and recommendations are useful and applicable in other contexts.

### Introduction

Tuberculosis (TB) and Human Immunodeficiency Virus (HIV) co-infection remain a major public health threat and challenge to health systems in many Low and Middle-income Countries (LMICs). According to the World Health Organization (WHO), people living with HIV (PLHIV) accounted for about 10% of the 10.4 million reported TB cases in 2016 (1). PLHIV are about 20 to 30 times more likely to develop active TB compared to those without HIV. Moreover, TB is the leading cause of death among PLHIV (in 2016, 374 000 deaths in PLHIV were attributed to TB) (1). HIV and TB co-infection also places immense burden on health systems in LMICs and threatens global TB and HIV reduction targets (2, 3). The HIV/TB co-infection burden is heaviest in sub-Saharan Africa (1).

Kenya is one of the countries with high burden of TB, HIV/TB and multi-drug resistant TB (MDR-TB) (4). Overall TB incidence for Kenya was 169,000 in 2016 and an incidence rate of 348 per 100,000 population (1, 5). Nonetheless, Kenya has made considerable progress in reducing the HIV/TB co-infection rate (from 45% in 2008 to 30% in 2016) (6, 7). In 2015, approximately 25,030 (31%) of the 81,518 persons who developed TB in Kenya were HIV infected (6).

To reduce the burden of TB among people living with HIV, the WHO recommends three interventions collectively termed 'the Three I's for TB/HIV' namely: intensified TB case-finding (ICF), Isoniazid Preventive Therapy (IPT) and infection control for TB (8, 9). IPT is an evidence-based intervention with proven effectiveness of reducing the risk of TB in



1  
2  
3 PLHIV by 33-62% (10). It is recommended for individuals with documented latent infection  
4 with *Mycobacterium tuberculosis* to prevent its progression into an active disease, and for  
5 PLHIV in areas with high HIV prevalence and latent TB prevalence greater than 30% (8-10).  
6 IPT involves the provision of isoniazid (INH) tablets to PLHIV who are TB negative or have  
7 latent TB. The dose varies between 5mg for children to 300 mg for adults (11, 12). WHO  
8 guidelines recommend at least 6 months of IPT for children and adults including pregnant  
9 women, PLHIV and those who have successfully completed TB treatment (13). In areas of  
10 high prevalence and transmission of TB among PLHIV, IPT is conditionally recommended  
11 for 36 months as a proxy for lifelong or continuous treatment (13).

12  
13  
14 Kenya adopted the 6 month IPT regimen for eligible persons in 2012. (14). However, IPT  
15 implementation for PLHIV started in 2012 at selected facilities under the United States  
16 government supported initiative, the President's Emergency Plan For AIDS Relief (PEPFAR)  
17 (14). County-wide scale-up of IPT began in March 2015 with Siaya, Kisumu, Migori, Homa-  
18 bay and Nairobi being the pioneer Counties due to the high HIV prevalence rates in these  
19 Counties (6). The roll-out was accompanied by an ambitious country-wide target of enrolling  
20 90% of PLHIV on IPT by December 2016 (6). Implementation is supported by various cadres  
21 of health care providers. IPT is prescribed by a registered clinician (usually clinical officers  
22 in most HIV clinics), who also assesses IPT eligibility by ruling out contraindications such as  
23 peripheral neuropathy or liver disease and recommend confirmatory laboratory tests if  
24 deemed necessary. Nurses are involved in measuring vital signs and linking new patients to  
25 care. Clinicians and nurses are also involved in intensified TB case finding procedure using a  
26 standard ministry of health standard ICF/IPT screening tool. They also monitor the treatment  
27 of patients that remain in care and update their IPT registers. Counsellors are involved in  
28 counselling new patients, caregivers (in the case of child patients) and patients that remain in  
29 care on the benefits of IPT to enhance adherence. Pharmacists dispense the drugs to the  
30 patients at initiation as well as during monthly re-fill visits. Social workers and community  
31 health volunteers are involved in contact tracing and linking both HIV and missing TB cases  
32 to care.

33  
34  
35 Despite the country's move to scale-up IPT, there is widespread evidence of sub-optimal  
36 implementation (6, 8, 15). The latest IPT coverage survey indicated that only 3.6% of adults  
37 and 10% children eligible were initiated into IPT in 2015 (6). While suboptimal IPT  
38 implementation is well documented, little is known about contextual factors that influence its  
39 implementation. Moreover, limited information exists on popular perceptions regarding its  
40 acceptability and factors influencing its application among health care providers in Kenya.

1  
2  
3 Yet, it is widely recognised that health care providers are the front-line people delivering  
4 health care interventions and their acceptability is key to successful implementation and  
5 effectiveness of health care interventions (16, 17). This study responded to this gap through  
6 an in-depth analysis of the factors influencing the acceptability of IPT among health care  
7 providers in selected HIV clinics in Nairobi County, Kenya. Assessing IPT acceptability  
8 among health care providers can help to better understand barriers and facilitators of IPT  
9 delivery at health facilities and therefore guide TB preventive care. Acceptability is also an  
10 important outcomes measure used to assess the effectiveness of implementation and to  
11 provide insights into how this contributes to health outcomes (18, 19).

12  
13  
14  
15  
16  
17 The study adopted Proctor et al's definition of acceptability as 'the perception among  
18 implementation stakeholders that a given treatment, service, practice or innovation is  
19 agreeable, palatable or satisfactory' (19).

## 20 21 22 **METHODS**

23  
24 **Study design:** This was a qualitative descriptive study using semi-structured, in-depth  
25 interviews. The design, data collection, analysis and reporting were conducted in accordance  
26 with the Standards for Reporting Qualitative Research (SRQR) (20).

27  
28  
29 **Study setting:** The study was conducted in three facilities in Nairobi City County - one of the  
30 47 Counties in Kenya - with a population of about 3,138,369 people between February and  
31 April 2017 (21). Nairobi County was selected because it was one of the pioneer Counties for  
32 the national rollout of IPT in 2015. The study adopted a cross-sectional approach. Three  
33 public health care facilities (for purposes of anonymity coded as Facility A, Facility B and  
34 Facility C) were purposefully selected based on physical location, size, and the high volumes  
35 of HIV and TB patients accessing integrated treatment services. Data were gathered through  
36 in-depth interviews with staff working in the HIV clinics referred to as Comprehensive Care  
37 Centres (CCCs). At the time of the study, Facility A had about 45 health personnel of  
38 different cadres supporting 10,226 HIV patients in its CCC. The facility's IPT uptake was  
39 70% in the last quarter of 2016. An average of 1,974 patients visited the clinic per month in  
40 the last quarter of 2016. Similarly, Facility B had about 25 health care providers in the CCC,  
41 supporting 4860 patients and an IPT uptake of 68% in the last quarter of 2016. On the other  
42 hand, Facility C had about 25 health care providers in the CCC, 1,133 patients enrolled in  
43 care, 65% of whom were on IPT in the last quarter of 2016.

44  
45  
46  
47  
48  
49  
50  
51  
52  
53 **Study participants:** The study involved eighteen health care providers – fourteen clinicians  
54 (clinical officers, nurses, and pharmacists) and four non-clinicians (counsellors) - working in  
55 the care centres of the selected health facilities. Respondents must have been involved in the  
56  
57

1  
2  
3 IPT programme and worked in the clinic for at least six months prior to the study. Those who  
4 were absent during study period were excluded. The providers were purposefully selected to  
5 ensure adequate representation in terms of gender, job cadre and length of stay at the facility.  
6 All consented to participate in the study.  
7

8  
9 **Sampling and recruitment:** Study participants were recruited through purposive sampling.  
10 This was facilitated by the lead researcher (EW) and the head nurses of the study HIV clinics.  
11 Pre-study meetings were convened in the clinics with facility managers and clinic staff to  
12 promote the study to eligible participants. Prospective participants were approached and  
13 contact established to agree on interview logistics such as dates, times and venues.  
14

15  
16 **Data collection:** In-depth interviews were conducted using an interview guide patterned after  
17 the themes of the conceptual framework of factors affecting implementation outcomes by  
18 Chaudoir et al. (2013). The interviews were led by the lead researcher. The framework  
19 groups factors affecting acceptability under five main categories: structural factors,  
20 innovation characteristics, provider level factors, patient-level factors and organizational  
21 factors (Figure 1). The interviews were privately conducted in the English language within  
22 the health facilities. Each session was approximately 45 minutes long and was audio-  
23 recorded. Data were collected between February and April 2017.  
24

25  
26 **Research team and reflexivity:** The corresponding author (EW) is a data analyst, early  
27 career epidemiologist and implementation science researcher. EW was a graduate student and  
28 not affiliated to the sites at the time of study. This provided confidence that the data obtained  
29 from the interviews were solely the participants' perceptions and not influenced by previous  
30 contact. Other authors had no previous contact with the study sites. MA is a research scientist  
31 with interests in implementation science, health policy and systems strengthening research.  
32 EE is a health system, policy and implementation science researcher. LI is an associate  
33 professor in public health, with interests in demography and implementation science. All  
34 authors are well versed in mixed methods research approaches.  
35

36  
37 **Data analysis:** Audio-recorded transcripts were transcribed verbatim. Inductive thematic  
38 analysis was conducted. Data verification for accuracy and completeness was done through  
39 reading and re-reading of the interview transcripts. Coding of the transcripts was done to  
40 identify themes, messages, and patterns emerging from the data. The developed codes were  
41 matched to ensure integrity and similarity between the researchers. A codebook was  
42 developed after integration and collation of the identified codes. From the codebook, broader  
43 themes and sub-themes that emerged from the data were identified and reviewed to ensure  
44 they were appropriate for the interpretation (22). As part of a validation process and to elicit  
45

feedback from the participants, an anonymised summary of the findings was shared with randomly selected participants.

**Ethical considerations:** Study approval and ethical clearance was obtained from the University of the Witwatersrand Human Research Ethics Committee (HREC) (approval No. M161164), Kenyatta National Hospital - University of Nairobi Ethics and Research Committee (approval No. P11/01/2017) and the Kenya Medical Research Institute Ethics and Research Committee (approval No. RES/7/3/1). A research permit was obtained from the National Commission for Science, Technology and Innovation (NACOSTI) to conduct the study in Nairobi County, Kenya. Participants were briefed about the study and their rights and provided with an information sheet. Informed consent was obtained from all study participants prior to the interviews. Permission to access the selected health facilities was obtained from the management of the respective health facilities.

**Patient and public involvement:** The study aimed to address factors affecting the acceptability of IPT among health care providers, an implementation outcome which may affect the delivery of the intervention to patients. The identified factors may help improve the quality of care for PLHIV by improving the implementation of IPT. Initial findings of the broader study were shared with health care providers. Findings of this study will be shared with broader programme and scientific communities through dissemination workshops, conferences and summary fact-sheets.

## RESULTS

The demographic characteristics of the eighteen health care providers who participated in the in-depth interviews are presented in Table 1.

**Table 1: Demographic characteristics of health care providers who participated in in-depth interviews per health facility**

| Variable     | Value             | Facility A | Facility B | Facility C | Total |
|--------------|-------------------|------------|------------|------------|-------|
| Sex          | Males             | 5          | 1          | 1          | 7     |
|              | Females           | 3          | 4          | 4          | 11    |
| Job category | Clinical officers | 3          | 3          | 2          | 8     |
|              | Nurses            | 2          | 1          | 2          | 4     |
|              | Counsellors       | 2          | 1          | 1          | 4     |
|              | Pharmacists       | 1          | 1          | -          | 2     |

|                   |         |   |   |   |    |
|-------------------|---------|---|---|---|----|
| Length of stay in | < 1     | - | - | 2 | 2  |
| CCC (years)       | 2 – 4   | 1 | 1 | - | 2  |
|                   | > 4     | 7 | 5 | 2 | 14 |
| Age (years)       | ≤ 30    | 1 | 2 | 1 | 4  |
|                   | 31 – 40 | 5 | 3 | 2 | 10 |
|                   | 41 – 50 | 1 | - | - | 1  |
|                   | > 50    | 2 | - | 1 | 3  |

### Factors affecting acceptability of IPT among health care providers

Although health care providers considered IPT to be an important intervention in the provision of care for PLHIV, they indicated several concerns with IPT at different levels that challenged their comfort and satisfaction with the intervention. The factors are grouped and presented in the following categories: structural factors, innovation characteristics provider and patient related factors, and organizational factors.

#### 1. Structural factors

Structural factors relate to the wider policy environment as well as the physical and working environment of the health care providers.

##### *Inadequate high level support for IPT implementation*

Most of the providers cited limited commitment at policy level in ensuring effective implementation and streamlining of the IPT programme, which consequently demotivated providers. A majority of the providers stated that strong commitment and explicit support from the policy makers and IPT programme managers was necessary for effective implementation of the programme. Areas of support identified included advocacy for IPT, improving supply of isoniazid drugs and proper monitoring and evaluation of the IPT.

*“...there is no initiative by those who are concerned in the TB programme. They need to make sure that they insist on IPT, and put some regulations or some rules to be followed to ensure IPT is given to every eligible patient...” (Non-clinical health care provider)*

*“The people concerned should be more involved in the programme. We are giving IPT but they are not fully engaged. We don’t get any feedback from them. They should monitor the supply of drugs and effects of IPT.” (Clinical health care provider)*

##### *Limited engagement with health care providers in the development of IPT guideline*

1  
2  
3 Providers lamented that there was pressure from policymakers to implement the IPT policy  
4 guidelines during their introduction or revision at the CCCs without provider involvement.  
5  
6 They noted that the consequence of this was to prescribe IPT without the full understanding  
7  
8 its implications.  
9

10 *“We were told these are the guidelines and we should follow...before they change the*  
11 *guidelines we should be involved...At the moment I don't feel like we are involved in*  
12 *this....” (Clinical health care provider)*  
13  
14

### 15 *Poor integration of IPT-related services*

16  
17 Most of the providers spoke of poor integration of IPT services in the clinic, noting that this  
18 hampered the delivery of the programme. It was noted that most of the clinical examinations  
19 required before IPT initiation were conducted in separate departments at additional costs.  
20  
21 They felt that the examinations should be performed in the same facility and the costs  
22 subsidized to encourage uptake among patients. Most respondents felt that facility  
23 management and policymakers had a key role in supporting effective implementation of the  
24 programme  
25  
26  
27  
28

29 *“...if we do [all] the tests from here, it will take like 30 minutes to do everything*  
30 *and give the patient IPT. When they come again for check-ups, we can still do them*  
31 *again from here, and it takes less time and we get results in real time....it will even be*  
32 *faster for the patients” (Clinical health care provider)*  
33  
34  
35

## 36 2. Innovation characteristics

37  
38  
39 Innovation factors relate to aspects of the intervention which enhance the chances of  
40 successful implementation. Discussions with care providers revealed two main issues linked  
41 to IPT as an innovation that hampered its acceptance and implementation in their context.  
42  
43 These are presented below.  
44

### 45 *Unclear IPT guidelines and standard operating procedures (SOPs)*

46  
47 Providers expressed discomfort with the IPT guidelines and SOPs citing lack of clarity. In  
48 particular, providers noted that guidelines on eligibility criteria, on how to decide whether a  
49 patient had active and latent TB and on the duration of IPT were unclear. Providers  
50 recommended a revision of the guidelines with specific regard to eligibility criteria and  
51 clarity on ruling-out active and latent TB before prescription. There was also a lack of  
52 national consensus on IPT-related services as part of the HIV/TB collaborative activities  
53  
54  
55  
56  
57

1  
2  
3 since some of the services differed among facilities. For instance, the provision of IPT with  
4 pyridoxine (to prevent peripheral neuropathy) versus IPT alone and monthly versus three-  
5 monthly drug re-fills were reported to vary from facility to facility.  
6  
7

8 *“I think it [IPT] is a good idea but the problem is with the protocol, the SOPs. They*  
9 *are not very clear. They are not well documented...” (Clinical health care provider)*

10  
11  
12 *“...They told us in the training that we should give IPT every month to the patient. We*  
13 *are not comfortable with it...we prefer three-month refill as we have been doing.*  
14 *Maybe they should re-evaluate these guidelines...” (Clinical health care provider)*  
15  
16  
17

### 18 *Long duration of IPT*

19 Health care providers largely expressed discomfort with the long duration of the IPT  
20 treatment regimen. They reported this to be a critical factor that influenced their delivery of  
21 the intervention mainly because of pill-burden and adverse effects reported by patients on  
22 long term therapy. Most respondents recommended a reduced duration of the drug with the  
23 help of suitable research.  
24  
25  
26  
27

28 *“If I had a chance, I would give an IPT that would be taken once. Not the daily one*  
29 *for six months. That’s a long time...” (Clinical health care provider)*  
30  
31  
32

### 33 3. Provider-related factors

34 Factors related to individual health care providers such as experience and knowledge of IPT  
35 and peer influence also had considerable bearing on the perception and implementation of  
36 IPT in the clinics.  
37  
38

#### 39 *Provider information and training on IPT*

40 Both clinical and non-clinical providers indicated that they needed to be empowered on the  
41 administration of IPT through additional information and training. Some providers cited  
42 limited or no specific training on IPT administration, which limited their ability to deliver the  
43 intervention. They recommended revision of guidelines and additional training on IPT, driven  
44 by policymakers as well as regular monitoring and reporting of IPT outcomes from research  
45 to guide implementation.  
46  
47  
48  
49

50 *“...Some of us have not been taken through training on IPT. It was just introduced*  
51 *and you are told, “Give IPT for this duration” ... I feel we should have been taken*  
52 *through training to know more about the IPT even before rolling it out.” (Clinical*  
53 *health care provider)*  
54  
55  
56  
57

### *Peer influence and perceptions on IPT*

The satisfaction of other health care providers with the intervention influenced their colleagues in the CCCs. Negative perceptions or doubts about the intervention by some health care providers affected the perception and delivery of IPT by the fellow providers.

*“...Colleagues say that patients tell them “I’ve seen a friend of my husband who took [IPT]...”, you know. So that experience with my colleagues from the patients’ mouth talking.... in fact, part of it was the reason why this facility delayed as a hospital to start IPT.” (clinical health care provider)*

### 4. Patient-related factors

Factors relating to the patients were thought to considerably affect health care providers’ perceptions and delivery of IPT. The following are health care providers’ reported patient-related factors affecting provider acceptability of IPT.

#### *Non-adherence to IPT and IPT side effects on Patients*

Non-adherence to IPT after initiation by patients was considered a demotivating factor in administering IPT. Non-adherence was attributed to fear of side-effects and pill burden among the patients. These views were shared by both the clinical and the non-clinical providers. Providers also reported that some patients stopped using the therapy as a result of reported side-effects. These discouraged others who became aware of these side-effects from enrolling on the programme. Participants expressed concern that non-adherence would eventually lead to development of resistance to isoniazid drugs in the long run resulting in MDR-TB or extensively drug-resistant TB (XDR-TB). Due to this, some providers reported basing their decision to deliver IPT on the immunological, virological and clinical state of the patients, while some considered the drug regimen of the patients. Ultimately, this influenced whether or not eligible patients were initiated. Respondents recommended considerations of patient clinical state and drug regimen and argued for these to be added to the IPT guidelines.

*“...At least for them to do a research and find out if these side-effects are really associated with IPT. But if it is found to be safe to use, I would not have any other recommendations...Uptake reduced because they were not starting anyone else on IPT for fear of side-effects and death.” (Clinical health care provider)*

#### *Pill burden among patients*

Health care providers also felt that IPT increased the pill burden among the patients which affected patients’ adherence to the medication. Providers described cases where patients



1  
2  
3 complained of the difficulty in adhering to isoniazid drugs while some completely declined to  
4 take the medication due to the high number of pills prescribed for PLHIV. As a result,  
5 providers recommended that a formulation of IPT with shorter duration for the patients.  
6  
7

8 *“... patients feel that these drugs are so many and some say they don't want to start*  
9 *these drugs altogether...” (Clinical health care provider)*  
10

11  
12 *“...if they can review the concentration now, then maybe find out the concentration*  
13 *that can still work and still be mild to the patients...because of the pill burden to these*  
14 *clients...” (Non-clinical health care provider)*  
15  
16  
17

### 18 *Inadequate patient information on IPT*

19 Information about the benefits and effects of IPT was reported to be limited among the  
20 patients. This resulted in rumours and misconceptions about IPT among the patients which  
21 led some patients to refuse to be initiated or to dispose of the medication even after being  
22 counselled. Providers expressed concern over the lack of consensus and support regarding  
23 patient education activities in the CCCs for IPT.  
24  
25  
26  
27

28 *“...We should conduct continuous medical education, and review how we provide*  
29 *patients with information ...” (Non-clinical health care provider)*  
30  
31

32 *“I think they need to do more education to the people... actually, most clients decline*  
33 *because they have never heard about it...they would say ‘I am being treated for TB*  
34 *yet I don't have TB signs” (Clinical health care provider)*  
35  
36  
37

### 38 5. Organizational factors

39 Organisational factors encompass factors related to the organizational context where IPT is  
40 implemented, in this case the CCCs. These factors affect effective implementation of IPT  
41 programmes.  
42  
43

#### 44 *Increased workload*

45 Most clinical providers complained of the high workload in the facility, which they felt  
46 negatively affected implementation of the IPT programme. Providers reported that the limited  
47 number of clinicians did not match the high volume of patients in the CCC. The procedures  
48 to be conducted on the patient before IPT initiation were also considered very long and hence  
49 a burden to a single clinician. Providers called for hiring of staff to be dedicated to IPT  
50 related activities in the CCCs.  
51  
52  
53  
54  
55  
56  
57

1  
2  
3 *“...by the time you do all the screening for conditions like hepatitis, before even*  
4 *convincing the patient to start IPT... it is a big workload because we have many*  
5 *patients waiting in line to be served.” (Clinical health care provider)*  
6  
7

8 *“To comment about the environment and the working condition, here we have very*  
9 *heavy workload...then if you follow the standard operating procedures to give IPT, it*  
10 *will take you very long to complete all those investigations, examinations and what*  
11 *have you...” (Clinical health care provider)*  
12  
13  
14

### 15 *Inconsistent Isoniazid drug supply*

16 Providers also mentioned stock-out of Isoniazid medication and other supplies related to the  
17 IPT programme in the facilities as a major impediment to effective implementation and  
18 acceptance of the therapy. They reported stock-outs in the previous year and considered this a  
19 factor that greatly affected IPT delivery. Some providers felt that the erratic stocks and poor  
20 supply of the medications indicated lack of support for the IPT programme among  
21 policymakers and management. This, in turn, negatively affected their perception, morale and  
22 delivery of the therapy.  
23  
24  
25  
26  
27  
28

29 *“...We started the programme nicely, empowering patients, counselling them on IPT,*  
30 *and encouraging them to take IPT... and then all of a sudden from nowhere, IPT*  
31 *drugs are not available” (clinical health care provider)*  
32  
33  
34

35 *“My biggest challenge with the management [in CCC] is when there is erratic supply*  
36 *of IPT...So the patients were out of medication for some time and when you send them*  
37 *out to buy them; of course it's not possible for them to get the drug...” (Clinical*  
38 *health care provider)*  
39  
40  
41

42 The factors affecting IPT acceptability among health care providers in the selected facilities  
43 are summarised in figure 2.  
44  
45

## 46 **DISCUSSION**

47 This study assessed the factors associated with provider acceptability of IPT in selected  
48 clinics in Nairobi City County in Kenya. The factors have been grouped into five broad  
49 categories viz. organisational, provider-related, patient-related, innovation and structural level  
50 factors. These constructs are in agreement with those presented in the literature (23).  
51  
52  
53  
54  
55  
56  
57

1  
2  
3 Among these findings, limited high-level commitment and support for the IPT programme by  
4 higher programme managers and policymakers stood out as perhaps the biggest barrier to  
5 successful IPT implementation. Discussions with care providers reaffirmed previous findings  
6 that supportive supervision, consistent engagement between policy makers and higher-level  
7 supervisors with care providers as well as the in-depth interaction between policymakers and  
8 practitioners remain crucial for effective IPT implementation. The findings support previous  
9 evidence from similar contexts that showed that poor monitoring and lack of supervision of  
10 the IPT programme by higher managers influence IPT uptake (11, 24).  
11  
12  
13  
14  
15

16  
17 Linked to high-level commitment and support is provider involvement in the formulation of  
18 policies and guidelines. The study found limited involvement of the health care providers in  
19 the enactment and implementation of the IPT guidelines. As a result, most respondents did  
20 not own the guidelines or were generally uncomfortable implementing them. Since only a  
21 few had received training and/or support in its implementation, they saw it as a challenge  
22 rather than an opportunity to improve the health of their clients. In fact, providers across all  
23 the three facilities expressed their frustrations that they were being pressured to implement  
24 and deliver an intervention whose origin or implications they knew little about. The  
25 lukewarm ownership of IPT among providers as a result of the limited engagement at design  
26 stage is not surprising and reinforces evidence in this area suggesting that successful  
27 implementation and compliance with such initiatives require mechanisms that help enforce  
28 official guidelines, address capacity gaps, and enhance provider and patient awareness (25).  
29  
30  
31  
32  
33  
34  
35

36 Another important finding from this study is how the nature of interventions (in this case  
37 IPT) affect implementation outcomes. The lack of clarity on some of the provisions of the  
38 guidelines meant that providers struggled to fully and effectively implement IPT provisions.  
39 This in turn, negatively impacted their acceptability of the intervention. This finding  
40 resonates with evidence from other studies (24, 26), and echoes the need for a well-planned  
41 engagement process with care givers whenever such guidelines are being developed and the  
42 need to make them as simple as possible.  
43  
44  
45  
46  
47

48 Similarly, better integration of IPT-related services at the clinics could significantly improve  
49 the delivery of IPT. Integration could entail incorporation of all or most of the IPT-related  
50 procedures in one room/space. This can reduce challenges such as loss-to-follow-up in  
51 TB/HIV treatment thereby assisting health care providers monitor the patients on IPT.  
52 Ultimately, this would lessen clinical provider workload. Lack of coordination between TB  
53 and HIV activities has been reported as a barrier to IPT implementation elsewhere (24). One  
54  
55  
56  
57  
58  
59  
60

1  
2  
3 study indicated that performing reading and interpreting Tuberculin Skin Tests (TSTs) in the  
4 context of busy HIV clinics was a challenge for both patients and staff, negatively affecting  
5 the implementation of the IPT programme (27). In our study, providers questioned the  
6 efficacy of Kenya's IPT approach to identifying latent TB considering the Kenyan IPT  
7 guidelines recommend a symptomatic algorithm and no Tuberculin Skin Test for IPT  
8 eligibility. Care providers have previously called for clarity of guidelines, showing that this is  
9 a major challenge to effective implementation and acceptance of IPT (27). This may also  
10 explain the lack of awareness among some providers of the benefits of IPT in some LMIC  
11 (24). Investigation of optimal duration, safety and efficacy of IPT and its role in reducing TB  
12 risk, particularly under programme conditions has been strongly recommended by the WHO  
13 (28).  
14  
15  
16  
17  
18  
19  
20

21 Previous studies have hypothesised that provider-level factors could predict implementation  
22 outcomes (29, 30). In our study, provider-related factors such as limited information and  
23 inadequate empowerment on IPT influenced acceptability of IPT. A general lack of  
24 knowledge and experience with IPT have also been reported as primary barriers to IPT  
25 implementation in South Africa and Ethiopia (24). It is therefore important that provider  
26 training and information is prioritised for both clinical and non-clinical providers before  
27 implementation to achieve the desired outcomes (31). Providers in our study also reported  
28 that lack of on-the-job training and support through mentorship and supportive supervision  
29 left them feeling inadequately equipped to handle emerging challenges associated with IPT  
30 implementation. These challenges highlight the need for tailor-made technical assistance  
31 during implementation including mentorship, retraining of the providers, training new staff,  
32 emotional support, and mechanisms that take into consideration the contextual challenges.  
33  
34  
35  
36  
37  
38  
39  
40

41 Another important determinant of IPT acceptability among providers in the study location  
42 were patient-level predictors. In our context, poor adherence and pill burden among patients  
43 were key barriers to IPT acceptance among providers and patients (as reported by providers).  
44 In low and middle income settings, adherence to IPT treatment is a critical factor that needs  
45 consideration when scaling treatment services. Despite poor patient adherence being a key  
46 factor affecting acceptability, there was lack of information among providers on evidence-  
47 based methods to monitor IPT adherence among patients. This might signify poor or lack of  
48 implementation of methods such as use of treatment buddies, lay health providers,  
49 community-based directly observed preventive therapy to monitor and enhance IPT  
50  
51  
52  
53  
54  
55  
56  
57  
58  
59  
60

1  
2  
3 adherence. The availability of resources for close monitoring, supervision and evaluation of  
4 IPT outcomes is strongly recommended by WHO (32).  
5

6  
7 Even though we used an exploratory approach to investigate IPT acceptance among  
8 providers, the providers reporting fear of isoniazid drug-resistance among patients should be  
9 cause for concern. This is particularly so because of the gradual increase in drug-resistant TB  
10 cases in Kenya (from 112 to 1300 in 2016) (15). Policymakers, health care providers and  
11 practitioners have questioned the implications of poor IPT adherence to drug-resistant TB  
12 disease especially in the case of long course INH mono-therapy (33, 34). To improve  
13 information on IPT among patients and boost uptake, national advocacy and patient  
14 awareness is needed, among other interventions.  
15  
16  
17  
18  
19

20  
21 In the organizational context, heavy workload on health care providers and isoniazid stock-  
22 outs in the HIV clinics discouraged providers from initiating patients into IPT, fearing for  
23 lack of drug adherence and associated side effects. Heavy workload among providers can  
24 often result in compromised quality and should be addressed as part of organisational context  
25 reforms to support IPT. In our study, this could be explained by the fact that the study clinics  
26 served a large population catchment area and not necessarily because the quality offered  
27 attracted patients to the clinics. Another reason for the heavy workload was inadequate  
28 staffing especially with regards to IPT trained staff. Ultimately, both factors risked the quality  
29 of care IPT patients received.  
30  
31  
32  
33  
34  
35

36  
37 The findings of this study have important policy implications. Firstly, the lack of clarity of  
38 IPT guidelines highlights a need for revision and standardization which would promote  
39 consensus among health care providers. Secondly, the findings highlight the need for  
40 strengthened monitoring and evaluation with a well-defined feedback mechanism of reporting  
41 by health care providers on IPT indicators. Finally, building both technical and logistic  
42 capacity in HIV clinics is important to improving the acceptability and ultimately the delivery  
43 of IPT.  
44  
45  
46  
47

48  
49 We recommend a number of interventions to improve health care provider acceptability in  
50 the context of the study clinics. First, involving health care providers in IPT guideline  
51 development and revision will make them more comfortable with implementation. Secondly,  
52 better integration of all IPT-related services in the same facility may help improve patient  
53 initiation, retention and follow-up of IPT. Additionally, training and continuous mentorship  
54  
55  
56  
57  
58  
59  
60

1  
2  
3 on IPT implementation for both clinical and non-clinical providers should be promoted in the  
4 health facilities to improve IPT acceptability and delivery.  
5  
6  
7  
8  
9

### 10 **Strengths and Limitations**

11 This study, to our knowledge, is among the first to assess the factors influencing the  
12 acceptability of IPT among health care providers in selected HIV clinics in Nairobi County,  
13 Kenya. The adaptation of existing theory and literature to guide the study enabled the  
14 collection of exhaustive context-specific information at different levels of the health system.  
15 The inclusion of both clinical and non-clinical personnel as key-informants in the interviews  
16 enabled the collection of information at different levels and cadres of health service provision  
17 thereby enhancing validity of the data. This study adhered to the Standards for Reporting  
18 Qualitative Research (SRQR).  
19  
20  
21  
22  
23  
24

25 Purposive selection of the health facilities may limit the generalizability of the findings from  
26 this study to other HIV clinics in Nairobi County. However, the study was context-specific  
27 and the aim was to elicit in-depth information on IPT acceptability in this context, which may  
28 inform health service provision and policy in health systems of similar context.  
29  
30  
31

32 Finally, the study was conducted among city hospitals, which are presumably better  
33 resourced as compared to those in other locations. Therefore, the IPT programme was  
34 expected to be better managed as opposed to other non-city HIV clinics. This could  
35 contribute to better acceptability of IPT among the providers whose concerns may not  
36 entirely reflect that of health care providers in other clinics in Nairobi County. Further studies  
37 aiming for generalizability should control for the tier of health facilities in assessing IPT  
38 acceptability.  
39  
40  
41  
42  
43  
44

### 45 **Conclusion**

46 The study gives insight of the complexity of factors affecting IPT implementation and the  
47 value of qualitative methods and guiding frameworks to elucidate these factors. The  
48 acceptability of IPT among health care providers in this context was influenced by factors at  
49 different levels namely: organizational level, provider level, patient level, innovation  
50 characteristics and structural level factors. Ensuring optimal acceptability of IPT among  
51 health care providers will require a robust engagement with both providers and patients by  
52 policy makers and IPT program managers, as well as on-the-job design specific actions to  
53  
54  
55  
56  
57  
58  
59  
60

1  
2  
3 support providers in implementation. This high level commitment and support for IPT could  
4 improve provider acceptability and ultimately delivery of the intervention.  
5

### 6 7 **Acknowledgements**

8 The authors are grateful to the management and staff at comprehensive care centres of the  
9 selected health facilities for their cooperation, perspectives and support during the study.  
10 Much gratitude also goes to the School of Public Health, Faculty of Health Sciences at the  
11 University of the Witwatersrand, Johannesburg, South Africa for the immense support that  
12 facilitated the timely completion of the study.  
13  
14  
15

16  
17 **Funding:** This work was funded by TDR, the Special Programme for Research and Training  
18 in Tropical Diseases, which is hosted at the World Health Organization and co-sponsored by  
19 UNICEF, UNDP, the World Bank and WHO. TDR grant number: B40299. First author  
20 ORCID ID: 0000-0002-4149-3417  
21  
22

23  
24 **Data sharing statement:** No additional data are available.

25  
26 **Competing interests:** The authors declare that they do not have any competing interests.

27  
28 **Ethics approval:** Study approval and ethical clearance to conduct the research was obtained  
29 from the University of the Witwatersrand Human Research Ethics Committee (HREC)  
30 (approval No. M161164), The Kenyatta National Hospital-University of Nairobi Ethics and  
31 Research Committee (approval No. P11/01/2017) and the Kenya Medical Research Institute  
32 Ethics and Research Committee (approval No. RES/7/3/1). A research permit was obtained  
33 from the National Commission for Science, Technology and Innovation (NACOSTI) to  
34 conduct the study in Nairobi County, Kenya.  
35  
36  
37  
38

39  
40 **Patient consent:** Informed consent was obtained from all study participants prior to the  
41 interviews.

42  
43 **Author contributions:** EW, MA, and LI contributed to the conceptualisation and design of  
44 the study including the development of the study tools. EW collected the data and did initial  
45 analysis and drafts of the manuscript. EE, MA and LI contributed to the data analysis,  
46 manuscript writing and editing. All authors read and approved the final version of the  
47 manuscript.  
48  
49  
50

### 51 52 **REFERENCES**

- 53  
54 1. World Health Organization. Global Tuberculosis Report 2017. Geneva; 2017.  
55 2. Sharma S, Mohan A, Kadhiravan T. HIV-TB co-infection: epidemiology, diagnosis &  
56 management. *Indian J Med Res.* 2005;121(4):550-67.  
57

3. Pawlowski A, Jansson M, Sköld M, Rottenberg ME, Källenius G. Tuberculosis and HIV co-infection. *PLoS pathogens*. 2012;8(2):e1002464.
4. World Health Organization. Use of high burden country lists for TB by WHO in the post-2015 era. Geneva: World Health Organization. 2015.
5. Ministry of Health. Kenya tuberculosis prevalence survey. Kenya; 2016.
6. National Tuberculosis Leprosy and Lung Disease Program (NTLD-P). Annual Report 2015. Kenya; 2015.
7. National AIDS and STI Control Program. Kenya HIV County Profiles 2016. Kenya; 2016.
8. World Health Organization. WHO policy on collaborative TB/HIV activities: guidelines for national programmes and other stakeholders. WHO policy on collaborative TB/HIV activities: guidelines for national programmes and other stakeholders 2012.
9. Getahun H, Van Gorkom J, Harries A, Harrington M, Nunn P. Interim policy on collaborative TB/HIV activities. 2004.
10. World Health Organization. WHO THREE I's MEETING: Intensified Case Finding (ICF), Isoniazid Preventive Therapy (IPT) and TB Infection Control (IC) for people living with HIV. Geneva; 2008.
11. Teklay G, Teklu T, Legesse B, Tedla K, Klinkenberg E. Barriers in the implementation of isoniazid preventive therapy for people living with HIV in Northern Ethiopia: a mixed quantitative and qualitative study. *BMC public health*. 2016;16(1):840.
12. World Health Organization. Recommendation on 36 months isoniazid preventive therapy to adults and adolescents living with HIV in resource-constrained and high TB-and HIV-prevalence settings—2015 update: World Health Organization; 2015.
13. World Health Organization. Guidelines for intensified tuberculosis case-finding and isoniazid preventive therapy for people living with HIV in resource-constrained settings. Geneva; 2011.
14. National Tuberculosis Leprosy and Lung Disease Program (NTLD-P). Isoniazid Preventive Therapy Kenya 2016 2016 [Available from: <https://www.nltip.co.ke/2016/05/26/1545-2/>].
15. World Health Organization. Global Tuberculosis Report 2016. Geneva, Switzerland; 2016.
16. Sekhon M, Cartwright M, Francis JJ. Acceptability of healthcare interventions: an overview of reviews and development of a theoretical framework. *BMC health services research*. 2017;17(1):88.
17. Proctor EK, Landsverk J, Aarons G, Chambers D, Glisson C, Mittman B. Implementation research in mental health services: an emerging science with conceptual, methodological, and training challenges. *Administration and Policy in Mental Health and Mental Health Services Research*. 2009;36(1):24-34.
18. Peters DH, Adam T, Alonge O, Agyepong IA, Tran N. Implementation research: what it is and how to do it. *Bmj*. 2013;347:f6753.
19. Proctor E, Silmere H, Raghavan R, Hovmand P, Aarons G, Bunker A, et al. Outcomes for implementation research: conceptual distinctions, measurement challenges, and research agenda. *Administration and Policy in Mental Health and Mental Health Services Research*. 2011;38(2):65-76.
20. O'Brien BC, Harris IB, Beckman TJ, Reed DA, Cook DA. Standards for reporting qualitative research: a synthesis of recommendations. *Academic Medicine*. 2014;89(9):1245-51.
21. Kenya National Bureau of Statistics. The 2009 Kenya Population and Housing Census: Population Distribution by Age, Sex and Administrative Units. Kenya. Kenya; 2010.
22. Braun V, Clarke V. Using thematic analysis in psychology. *Qualitative research in psychology*. 2006;3(2):77-101.
23. Chaudoir SR, Dugan AG, Barr CH. Measuring factors affecting implementation of health innovations: a systematic review of structural, organizational, provider, patient, and innovation level measures. *Implementation Science*. 2013;8(1):22.
24. Lester R, Hamilton R, Charalambous S, Dwadwa T, Chandler C, Churchyard GJ, et al. Barriers to implementation of isoniazid preventive therapy in HIV clinics: a qualitative study. *Aids*. 2010;24:S45-S8.
25. Atela M, Bakibinga P, Ettarh R, Kyobutungi C, Cohn S. Strengthening health system governance using health facility service charters: a mixed methods assessment of community experiences and perceptions in a district in Kenya. *BMC health services research*. 2015;15(1):539.



26. Makoni A, Chemhuru M, Tshimanga M, Gombe NT, Mungati M, Bangure D. Evaluation of the isoniazid preventive therapy (IPT) program in Shurugwi District, Midlands Province, Zimbabwe, January 2013 to August 2014. *BMC research notes*. 2015;8(1):476.
27. Ait-Khaled N, Alarcon E, Bissell K, Boillot F, Caminero J, Chiang C, et al. Isoniazid preventive therapy for people living with HIV: public health challenges and implementation issues [Unresolved issues]. *The International Journal of Tuberculosis and Lung Disease*. 2009;13(8):927-35.
28. World Health Organization. The Global Plan to Stop TB 2011 - 2015. Geneva; 2011.
29. Durlak JA, DuPre EP. Implementation matters: A review of research on the influence of implementation on program outcomes and the factors affecting implementation. *American journal of community psychology*. 2008;41(3-4):327.
30. Damschroder LJ, Aron DC, Keith RE, Kirsh SR, Alexander JA, Lowery JC. Fostering implementation of health services research findings into practice: a consolidated framework for advancing implementation science. *Implementation science*. 2009;4(1):50.
31. Wandersman A, Duffy J, Flaspohler P, Noonan R, Lubell K, Stillman L, et al. Bridging the gap between prevention research and practice: The interactive systems framework for dissemination and implementation. *American journal of community psychology*. 2008;41(3-4):171-81.
32. World Health Organization. Guide to Monitoring and Evaluation for Collaborative TB/HIV Activities--2015 Update: World Health Organization; 2015.
33. Vitoria M, Granich R, Banda M, Fox MY, Gilks C. Implementation of co-trimoxazole prophylaxis and isoniazid preventive therapy for people living with HIV. *Bulletin of the World Health Organization*. 2010;88:253-9.
34. Woldehanna S, Volmink J. Treatment of latent tuberculosis infection in HIV infected persons. *The Cochrane database of systematic reviews*. 2004(1):Cd000171.

## Figure legends

Figure 1 Conceptual framework of factors affecting acceptability of IPT among health care providers. Adapted from Chaudoir et al. (2013)

Figure 2 Conceptual framework of factors influencing the acceptability of IPT among health care providers in selected HIV clinics in Nairobi County, Kenya



1  
2  
3  
4  
5  
6  
7  
8  
9  
10  
11  
12  
13  
14  
15  
16  
17  
18  
19  
20  
21  
22  
23  
24  
25  
26  
27  
28  
29  
30  
31  
32  
33  
34  
35  
36  
37  
38  
39  
40  
41  
42  
43  
44  
45  
46  
47  
48  
49  
50  
51  
52  
53  
54  
55  
56  
57  
58  
59  
60

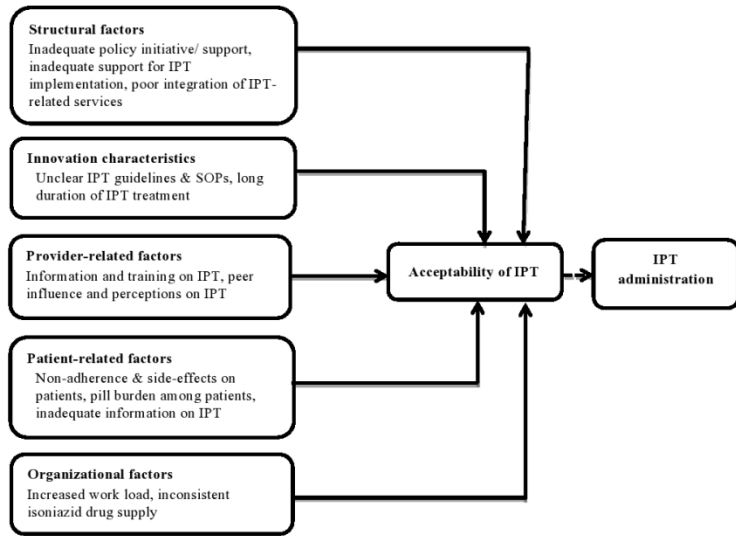

Figure 2 Conceptual framework of factors influencing the acceptability of IPT among health care providers in selected HIV clinics in Nairobi County, Kenya

107x139mm (300 x 300 DPI)

# Reporting checklist for qualitative study.

Based on the SRQR guidelines.

## Instructions to authors

Complete this checklist by entering the page numbers from your manuscript where readers will find each of the items listed below.

Your article may not currently address all the items on the checklist. Please modify your text to include the missing information. If you are certain that an item does not apply, please write "n/a" and provide a short explanation.

Upload your completed checklist as an extra file when you submit to a journal.

In your methods section, say that you used the SRQR reporting guidelines, and cite them as:

O'Brien BC, Harris IB, Beckman TJ, Reed DA, Cook DA. Standards for reporting qualitative research: a synthesis of recommendations. *Acad Med.* 2014;89(9):1245-1251.

|                                            | Reporting Item                                                                                                                                                                                                                          | Page Number |
|--------------------------------------------|-----------------------------------------------------------------------------------------------------------------------------------------------------------------------------------------------------------------------------------------|-------------|
|                                            | #1 Concise description of the nature and topic of the study identifying the study as qualitative or indicating the approach (e.g. ethnography, grounded theory) or data collection methods (e.g. interview, focus group) is recommended | 1           |
|                                            | #2 Summary of the key elements of the study using the abstract format of the intended publication; typically includes background, purpose, methods, results and conclusions                                                             | 2           |
| Problem formulation                        | #3 Description and significance of the problem / phenomenon studied: review of relevant theory and empirical work; problem statement                                                                                                    | 4,5,6       |
| Purpose or research question               | #4 Purpose of the study and specific objectives or questions                                                                                                                                                                            | 2,6         |
| Qualitative approach and research paradigm | #5 Qualitative approach (e.g. ethnography, grounded theory, case study, phenomenology, narrative research) and                                                                                                                          | 6           |

guiding theory if appropriate; identifying the research paradigm (e.g. postpositivist, constructivist / interpretivist) is also recommended; rationale. The rationale should briefly discuss the justification for choosing that theory, approach, method or technique rather than other options available; the assumptions and limitations implicit in those choices and how those choices influence study conclusions and transferability. As appropriate the rationale for several items might be discussed together.

|    |                           |     |                                                              |     |
|----|---------------------------|-----|--------------------------------------------------------------|-----|
| 1  |                           |     |                                                              |     |
| 2  |                           |     |                                                              |     |
| 3  |                           |     |                                                              |     |
| 4  |                           |     |                                                              |     |
| 5  |                           |     |                                                              |     |
| 6  |                           |     |                                                              |     |
| 7  |                           |     |                                                              |     |
| 8  |                           |     |                                                              |     |
| 9  |                           |     |                                                              |     |
| 10 |                           |     |                                                              |     |
| 11 |                           |     |                                                              |     |
| 12 |                           |     |                                                              |     |
| 13 |                           |     |                                                              |     |
| 14 | Researcher                | #6  | Researchers' characteristics that may influence the          | 7   |
| 15 | characteristics and       |     | research, including personal attributes, qualifications /    |     |
| 16 | reflexivity               |     | experience, relationship with participants, assumptions      |     |
| 17 |                           |     | and / or presuppositions; potential or actual interaction    |     |
| 18 |                           |     | between researchers' characteristics and the research        |     |
| 19 |                           |     | questions, approach, methods, results and / or               |     |
| 20 |                           |     | transferability                                              |     |
| 21 |                           |     |                                                              |     |
| 22 |                           |     |                                                              |     |
| 23 |                           |     |                                                              |     |
| 24 |                           |     |                                                              |     |
| 25 | Context                   | #7  | Setting / site and salient contextual factors; rationale     | 6   |
| 26 |                           |     |                                                              |     |
| 27 |                           |     |                                                              |     |
| 28 | Sampling strategy         | #8  | How and why research participants, documents, or             | 6-7 |
| 29 |                           |     | events were selected; criteria for deciding when no          |     |
| 30 |                           |     | further sampling was necessary (e.g. sampling                |     |
| 31 |                           |     | saturation); rationale                                       |     |
| 32 |                           |     |                                                              |     |
| 33 |                           |     |                                                              |     |
| 34 |                           |     |                                                              |     |
| 35 | Ethical issues pertaining | #9  | Documentation of approval by an appropriate ethics           | 8   |
| 36 | to human subjects         |     | review board and participant consent, or explanation for     |     |
| 37 |                           |     | lack thereof; other confidentiality and data security issues |     |
| 38 |                           |     |                                                              |     |
| 39 |                           |     |                                                              |     |
| 40 | Data collection methods   | #10 | Types of data collected; details of data collection          | 7   |
| 41 |                           |     | procedures including (as appropriate) start and stop         |     |
| 42 |                           |     | dates of data collection and analysis, iterative process,    |     |
| 43 |                           |     | triangulation of sources / methods, and modification of      |     |
| 44 |                           |     | procedures in response to evolving study findings;           |     |
| 45 |                           |     | rationale                                                    |     |
| 46 |                           |     |                                                              |     |
| 47 |                           |     |                                                              |     |
| 48 |                           |     |                                                              |     |
| 49 |                           |     |                                                              |     |
| 50 | Data collection           | #11 | Description of instruments (e.g. interview guides,           | 7   |
| 51 | instruments and           |     | questionnaires) and devices (e.g. audio recorders) used      |     |
| 52 | technologies              |     | for data collection; if / how the instruments(s) changed     |     |
| 53 |                           |     | over the course of the study                                 |     |
| 54 |                           |     |                                                              |     |
| 55 |                           |     |                                                              |     |
| 56 |                           |     |                                                              |     |
| 57 | Units of study            | #12 | Number and relevant characteristics of participants,         | 6   |
| 58 |                           |     | documents, or events included in the study; level of         |     |
| 59 |                           |     |                                                              |     |
| 60 |                           |     |                                                              |     |

|    |                                                                                              |                                                                                                                                                                                                                                                                                                              |       |
|----|----------------------------------------------------------------------------------------------|--------------------------------------------------------------------------------------------------------------------------------------------------------------------------------------------------------------------------------------------------------------------------------------------------------------|-------|
|    |                                                                                              | participation (could be reported in results)                                                                                                                                                                                                                                                                 |       |
| 1  |                                                                                              |                                                                                                                                                                                                                                                                                                              |       |
| 2  |                                                                                              |                                                                                                                                                                                                                                                                                                              |       |
| 3  | Data processing                                                                              | #13 Methods for processing data prior to and during analysis, including transcription, data entry, data management and security, verification of data integrity, data coding, and anonymisation / deidentification of excerpts                                                                               | 7     |
| 4  |                                                                                              |                                                                                                                                                                                                                                                                                                              |       |
| 5  |                                                                                              |                                                                                                                                                                                                                                                                                                              |       |
| 6  |                                                                                              |                                                                                                                                                                                                                                                                                                              |       |
| 7  |                                                                                              |                                                                                                                                                                                                                                                                                                              |       |
| 8  |                                                                                              |                                                                                                                                                                                                                                                                                                              |       |
| 9  | Data analysis                                                                                | #14 Process by which inferences, themes, etc. were identified and developed, including the researchers involved in data analysis; usually references a specific paradigm or approach; rationale                                                                                                              | 7     |
| 10 |                                                                                              |                                                                                                                                                                                                                                                                                                              |       |
| 11 |                                                                                              |                                                                                                                                                                                                                                                                                                              |       |
| 12 |                                                                                              |                                                                                                                                                                                                                                                                                                              |       |
| 13 |                                                                                              |                                                                                                                                                                                                                                                                                                              |       |
| 14 |                                                                                              |                                                                                                                                                                                                                                                                                                              |       |
| 15 |                                                                                              |                                                                                                                                                                                                                                                                                                              |       |
| 16 | Techniques to enhance trustworthiness                                                        | #15 Techniques to enhance trustworthiness and credibility of data analysis (e.g. member checking, audit trail, triangulation); rationale                                                                                                                                                                     | 7,8   |
| 17 |                                                                                              |                                                                                                                                                                                                                                                                                                              |       |
| 18 |                                                                                              |                                                                                                                                                                                                                                                                                                              |       |
| 19 |                                                                                              |                                                                                                                                                                                                                                                                                                              |       |
| 20 |                                                                                              |                                                                                                                                                                                                                                                                                                              |       |
| 21 | Syntheses and interpretation                                                                 | #16 Main findings (e.g. interpretations, inferences, and themes); might include development of a theory or model, or integration with prior research or theory                                                                                                                                               | 8-14  |
| 22 |                                                                                              |                                                                                                                                                                                                                                                                                                              |       |
| 23 |                                                                                              |                                                                                                                                                                                                                                                                                                              |       |
| 24 |                                                                                              |                                                                                                                                                                                                                                                                                                              |       |
| 25 |                                                                                              |                                                                                                                                                                                                                                                                                                              |       |
| 26 |                                                                                              |                                                                                                                                                                                                                                                                                                              |       |
| 27 | Links to empirical data                                                                      | #17 Evidence (e.g. quotes, field notes, text excerpts, photographs) to substantiate analytic findings                                                                                                                                                                                                        | 8-14  |
| 28 |                                                                                              |                                                                                                                                                                                                                                                                                                              |       |
| 29 |                                                                                              |                                                                                                                                                                                                                                                                                                              |       |
| 30 |                                                                                              |                                                                                                                                                                                                                                                                                                              |       |
| 31 | Intergration with prior work, implications, transferability and contribution(s) to the field | #18 Short summary of main findings; explanation of how findings and conclusions connect to, support, elaborate on, or challenge conclusions of earlier scholarship; discussion of scope of application / generalizability; identification of unique contributions(s) to scholarship in a discipline or field | 14-17 |
| 32 |                                                                                              |                                                                                                                                                                                                                                                                                                              |       |
| 33 |                                                                                              |                                                                                                                                                                                                                                                                                                              |       |
| 34 |                                                                                              |                                                                                                                                                                                                                                                                                                              |       |
| 35 |                                                                                              |                                                                                                                                                                                                                                                                                                              |       |
| 36 |                                                                                              |                                                                                                                                                                                                                                                                                                              |       |
| 37 |                                                                                              |                                                                                                                                                                                                                                                                                                              |       |
| 38 |                                                                                              |                                                                                                                                                                                                                                                                                                              |       |
| 39 |                                                                                              |                                                                                                                                                                                                                                                                                                              |       |
| 40 | Limitations                                                                                  | #19 Trustworthiness and limitations of findings                                                                                                                                                                                                                                                              | 17    |
| 41 |                                                                                              |                                                                                                                                                                                                                                                                                                              |       |
| 42 |                                                                                              |                                                                                                                                                                                                                                                                                                              |       |
| 43 | Conflicts of interest                                                                        | #20 Potential sources of influence of perceived influence on study conduct and conclusions; how these were managed                                                                                                                                                                                           | 18    |
| 44 |                                                                                              |                                                                                                                                                                                                                                                                                                              |       |
| 45 |                                                                                              |                                                                                                                                                                                                                                                                                                              |       |
| 46 |                                                                                              |                                                                                                                                                                                                                                                                                                              |       |
| 47 |                                                                                              |                                                                                                                                                                                                                                                                                                              |       |
| 48 | Funding                                                                                      | #21 Sources of funding and other support; role of funders in data collection, interpretation and reporting                                                                                                                                                                                                   | 19    |
| 49 |                                                                                              |                                                                                                                                                                                                                                                                                                              |       |
| 50 |                                                                                              |                                                                                                                                                                                                                                                                                                              |       |

The SRQR checklist is distributed with permission of Wolters Kluwer © 2014 by the Association of American Medical Colleges. This checklist was completed on 18. May 2018 using <http://www.goodreports.org/>, a tool made by the [EQUATOR Network](#) in collaboration with [Penelope.ai](#)

# BMJ Open

## Factors affecting the acceptability of isoniazid preventive therapy among health care providers in selected HIV clinics in Nairobi County, Kenya: A qualitative study

|                                 |                                                                                                                                                                                                                                                                                                                                                                                                                                                                          |
|---------------------------------|--------------------------------------------------------------------------------------------------------------------------------------------------------------------------------------------------------------------------------------------------------------------------------------------------------------------------------------------------------------------------------------------------------------------------------------------------------------------------|
| Journal:                        | <i>BMJ Open</i>                                                                                                                                                                                                                                                                                                                                                                                                                                                          |
| Manuscript ID                   | bmjopen-2018-024286.R2                                                                                                                                                                                                                                                                                                                                                                                                                                                   |
| Article Type:                   | Research                                                                                                                                                                                                                                                                                                                                                                                                                                                                 |
| Date Submitted by the Author:   | 05-Nov-2018                                                                                                                                                                                                                                                                                                                                                                                                                                                              |
| Complete List of Authors:       | Wambiya, Elvis; African Population and Health Research Center, Research; University of the witwatersrand, School of Public Health<br>Atela, Martin<br>Eboreime, Ejemai; University of the Witwatersrand, School of public health, Public health; National Primary Health Care Development Agency, Planning, Research and Statistics<br>Ibisomi, Latifat; University of Witswaterstrand, School of Public Health; Nigerian Institute of Medical Research (NIMR), Research |
| <b>Primary Subject Heading</b>: | Infectious diseases                                                                                                                                                                                                                                                                                                                                                                                                                                                      |
| Secondary Subject Heading:      | HIV/AIDS, Qualitative research, Public health                                                                                                                                                                                                                                                                                                                                                                                                                            |
| Keywords:                       | HIV & AIDS < INFECTIOUS DISEASES, Tuberculosis < INFECTIOUS DISEASES, QUALITATIVE RESEARCH, Public health < INFECTIOUS DISEASES                                                                                                                                                                                                                                                                                                                                          |
|                                 |                                                                                                                                                                                                                                                                                                                                                                                                                                                                          |

SCHOLARONE™  
Manuscripts

1  
2  
3 **Factors affecting the acceptability of isoniazid preventive therapy among health care providers**  
4 **in selected HIV clinics in Nairobi County, Kenya: A qualitative study**  
5

6 **Corresponding author:** Mr. Elvis Omondi Achach Wambiya, P.O. Box 205 – 00242,  
7 Kitengela, Kenya, Email: eowambiya@gmail.com. Telephone: +254797184545  
8

9  
10 Dr. Martin Atela, P.O. Box 53542 - 00200 Nairobi, Kenya. Email:  
11 m.atelah@googlemail.com, Telephone: +254733280413  
12

13 Dr. Ejemai Eboreime, University of the Witwatersrand, School of Public Health, Centre for  
14 Health Policy, Johannesburg, South Africa; National Primary Health Care Development  
15 Agency, Department of Planning Research & Statistics Abuja, Nigeria, 1 Jan Smuts Avenue,  
16 Braamfontein, Johannesburg, 2000, South Africa, Email: ejemai.eboreime@wits.ac.za,  
17 Telephone: +2347035763597  
18

19  
20 Prof. Latifat Ibisomi, University of the Witwatersrand, School of Public Health, Division of  
21 Epidemiology and Biostatistics; Nigerian Institute of Medical Research (NIMR), Lagos  
22 Nigeria. 1 Jan Smuts Avenue, Braamfontein, Johannesburg, 2000, South Africa. Email:  
23 Latifat.Ibisomi@wits.ac.za. Telephone: +27 (0) 11 717 2607  
24

25  
26  
27 Word count: 5526  
28  
29  
30  
31  
32  
33  
34  
35  
36  
37  
38  
39  
40  
41  
42  
43  
44  
45  
46  
47  
48  
49  
50  
51  
52  
53  
54  
55  
56  
57  
58  
59  
60



**Research question**

What are the factors affecting the acceptability of isoniazid preventive therapy among health care providers in selected HIV clinics in Nairobi County, Kenya?

**ABSTRACT****Objective**

Despite being globally recommended as an effective intervention in tuberculosis (TB) prevention among people living with HIV (PLHIV), Isoniazid preventive therapy (IPT) implementation remains sub-optimal, especially in sub-Saharan Africa. This study explored the factors influencing the acceptability of IPT among health care providers in selected HIV clinics in Nairobi County, Kenya, a high HIV/TB burden country.

**Design**

A qualitative study was conducted using in-depth interviews with health care providers in selected HIV clinics. All conversations were audio-recorded, transcribed verbatim and analysed using a thematic approach.

**Setting**

The study was conducted in the HIV clinics of three purposefully selected public health care facilities in Nairobi County, Kenya between February 2017 and April 2017.

**Participants**

Eighteen purposefully selected health care providers (clinicians, nurses, pharmacists and counsellors) working in the HIV clinics participated in the study.

**Results**

Provider acceptability of IPT was influenced by factors relating to the organizational context, provider training on IPT and their perception on its efficacy, length and clarity of IPT guidelines and standard operation procedures, as well as structural factors (policy, physical and work environment). Inadequate high-level commitment and support for the IPT programme by programme managers and policymakers were found to be the major barriers to successful IPT implementation in our study context.

**Conclusion**

This study provides insight into the complexity of factors affecting IPT implementation in Kenya. Ensuring optimal acceptability of IPT among health care providers will require expanded depth of engagement by policy makers and IPT programme managers with both providers and patients, as well as on-the-job design specific actions to support providers in implementation. Such high-level commitment and support is consequently essential for quality delivery of the intervention.

1  
2  
3  
4  
5  
6  
7  
8  
9  
10  
11  
12  
13  
14  
15  
16  
17  
18  
19  
20  
21  
22  
23  
24  
25  
26  
27  
28  
29  
30  
31  
32  
33  
34  
35  
36  
37  
38  
39  
40  
41  
42  
43  
44  
45  
46  
47  
48  
49  
50  
51  
52  
53  
54  
55  
56  
57  
58  
59  
60

**Key Words:** Acceptability, Isoniazid, Comprehensive care centre, health care provider, HIV/TB

For peer review only

## Article Summary:

### Strengths and Limitations of this study

- To our knowledge, this is among the first qualitative studies exploring factors influencing the acceptability of Isoniazid Preventive Therapy among health care providers in the context of HIV clinics providing integrated HIV and TB services.
- The inclusion of both clinical and non-clinical health care providers in the study enabled the collection of information at different levels and cadres of health service provision thereby enhancing the breadth and validity of the information obtained.
- The adaptation of existing theory and literature to guide the study enabled the collection of context-specific information at different levels of the health system.
- Purposive selection of the health facilities included in the study may limit the generalisability of our findings beyond the study context. However, the conclusions and recommendations are useful and applicable in other contexts.

### Introduction

Tuberculosis (TB) and Human Immunodeficiency Virus (HIV) co-infection remain a major public health threat and challenge to health systems in many Low and Middle-income Countries (LMICs). According to the World Health Organization (WHO), people living with HIV (PLHIV) accounted for about 10% of the 10.4 million reported TB cases in 2016 (1). PLHIV are about 20 to 30 times more likely to develop active TB compared to those without HIV. Moreover, TB is the leading cause of death among PLHIV. In fact, 374 000 deaths among PLHIV in 2016 were attributed to TB (1). HIV and TB co-infection also places immense burden on health systems in LMICs and threatens global TB and HIV reduction targets (2, 3). The HIV/TB co-infection burden is heaviest in sub-Saharan Africa (1).

Kenya is one of the countries with high burden of TB, HIV/TB and multi-drug resistant TB (MDR-TB) (4). Overall TB incidence for Kenya was 169,000 in 2016 and an incidence rate of 348 per 100,000 population (1, 5). Nonetheless, Kenya has made considerable progress in reducing the HIV/TB co-infection rate which fell from 45% in 2008 to 30% in 2016 (6, 7). In 2015, approximately 31% of persons who developed TB in Kenya were HIV infected (6).

To reduce the burden of TB among people living with HIV, the WHO recommends three interventions collectively termed ‘the Three I’s for TB/HIV’ namely: intensified TB case-finding (ICF), Isoniazid Preventive Therapy (IPT) and infection control for TB (8, 9). IPT is an evidence-based intervention with proven effectiveness of reducing the risk of TB in PLHIV by 33-62% (10). It is recommended for individuals with documented latent infection with

1  
2  
3 *Mycobacterium tuberculosis* to prevent its progression into an active disease, and for PLHIV  
4 in areas with high HIV prevalence and latent TB prevalence greater than 30% (8-10). IPT  
5 involves the provision of isoniazid (INH) tablets to PLHIV who are TB negative or have latent  
6 TB. The recommended dose is 10 mg/kg daily for children and up to 300 mg/day for adults  
7  
8  
9  
10  
11  
12  
13  
14  
15  
16  
17  
18  
19  
20  
21  
22  
23  
24  
25  
26  
27  
28  
29  
30  
31  
32  
33  
34  
35  
36  
37  
38  
39  
40  
41  
42  
43  
44  
45  
46  
47  
48  
49  
50  
51  
52  
53  
54  
55  
56  
57  
58  
59  
60

*Mycobacterium tuberculosis* to prevent its progression into an active disease, and for PLHIV in areas with high HIV prevalence and latent TB prevalence greater than 30% (8-10). IPT involves the provision of isoniazid (INH) tablets to PLHIV who are TB negative or have latent TB. The recommended dose is 10 mg/kg daily for children and up to 300 mg/day for adults (11, 12). WHO guidelines recommend at least 6 months of IPT for children and adults including pregnant women, PLHIV and those who have successfully completed TB treatment (13). In areas of high prevalence and transmission of TB among PLHIV, IPT is conditionally recommended for 36 months as a proxy for lifelong or continuous treatment (13).

Kenya adopted the 6 month IPT regimen for eligible persons in 2012. (14). However, IPT implementation for PLHIV started in 2012 at selected facilities under the United States government supported initiative, the President's Emergency Plan For AIDS Relief (PEPFAR) (14). County-wide scale-up of IPT began in March 2015 with Siaya, Kisumu, Migori, Homa-bay and Nairobi being the pioneer Counties due to the high HIV prevalence rates in these Counties (6). The roll-out was accompanied by an ambitious country-wide target of enrolling 90% of PLHIV on IPT by December 2016 (6). Implementation is supported by various cadres of health care providers. IPT is prescribed by a registered clinician (usually clinical officers in most HIV clinics), who also assesses IPT eligibility by ruling out contraindications such as peripheral neuropathy or liver disease and recommend confirmatory laboratory tests if deemed necessary. Nurses are involved in measuring vital signs and linking new patients to care. Clinicians and nurses are also involved in intensified TB case finding procedure using a standard Ministry of Health standard ICF/IPT screening tool. They also monitor the treatment of patients that remain in care and update their IPT registers. Counsellors are involved in counselling new patients, caregivers (in the case of child patients) and patients that remain in care on the benefits of IPT to enhance adherence. Pharmacists dispense the drugs to the patients at initiation as well as during monthly re-fill visits. Social workers and community health volunteers are involved in contact tracing and linking both HIV and missing TB cases to care. Despite the country's move to scale-up IPT, there is widespread evidence of sub-optimal implementation (6, 8, 15). The latest IPT coverage survey indicated that only 3.6% of adults and 10% children eligible were initiated into IPT in 2015 (6). While suboptimal IPT implementation is well documented, little is known about contextual factors that influence its implementation. Moreover, limited information exists on popular perceptions regarding its acceptability and factors influencing its application among health care providers in Kenya. Yet, it is widely recognised that health care providers are the front-line people delivering health care interventions and their acceptability is key to successful implementation and effectiveness of

1  
2  
3 health care interventions (16, 17). This study responded to this gap through an in-depth analysis  
4 of the factors influencing the acceptability of IPT among health care providers in selected HIV  
5 clinics in Nairobi County, Kenya. Assessing IPT acceptability among health care providers can  
6 help to better understand barriers and facilitators of IPT delivery at health facilities and  
7 therefore guide TB preventive care. Acceptability is also an important outcomes measure used  
8 to assess the effectiveness of implementation and to provide insights into how this contributes  
9 to health outcomes (18, 19).

10  
11  
12  
13  
14  
15 The study adopted Proctor et al's definition of acceptability as 'the perception among  
16 implementation stakeholders that a given treatment, service, practice or innovation is  
17 agreeable, palatable or satisfactory' (19).

## 20 METHODS

21  
22 **Study design:** This was a qualitative descriptive study using semi-structured, in-depth  
23 interviews. The design, data collection, analysis and reporting were conducted in accordance  
24 with the Standards for Reporting Qualitative Research (SRQR) (20).

25  
26  
27 **Study setting:** The study was conducted in three facilities in Nairobi City County - one of the  
28 47 Counties in Kenya - with a population of about 3,138,369 people between February and  
29 April 2017 (21). Nairobi County was selected because it was one of the pioneer Counties for  
30 the national rollout of IPT in 2015. The study adopted a cross-sectional approach. Three public  
31 health care facilities (for purposes of anonymity coded as Facility A, Facility B and Facility C)  
32 were purposefully selected based on physical location, size, and the high volumes of HIV and  
33 TB patients accessing integrated treatment services. Data were gathered through in-depth  
34 interviews with staff working in the HIV clinics referred to as Comprehensive Care Centres  
35 (CCCs). At the time of the study, Facility A had about 45 health personnel of different cadres  
36 supporting 10,226 HIV patients in its CCC. The facility's IPT uptake was 70% in the last  
37 quarter of 2016. An average of 1,974 patients visited the clinic per month in the last quarter of  
38 2016. Similarly, Facility B had about 25 health care providers in the CCC, supporting 4860  
39 patients and an IPT uptake of 68% in the last quarter of 2016. On the other hand, Facility C  
40 had about 25 health care providers in the CCC, 1,133 patients enrolled in care, 65% of whom  
41 were on IPT in the last quarter of 2016.

42  
43  
44  
45  
46  
47  
48  
49  
50  
51  
52  
53 **Study participants:** The study involved eighteen health care providers – fourteen clinicians  
54 (clinical officers, nurses, and pharmacists) and four non-clinicians (counsellors) - working in  
55 the care centres of the selected health facilities. Respondents must have been involved in the  
56 IPT programme and worked in the clinic for at least six months prior to the study. Those who  
57 were absent during study period were excluded. The providers were purposefully selected to  
58  
59  
60

1  
2  
3 ensure adequate representation in terms of gender, job cadre and length of stay at the facility.  
4 All consented to participate in the study.  
5

6 **Sampling and recruitment:** Study participants were recruited through purposive sampling.  
7 This was facilitated by the lead researcher (EW) and the head nurses of the study HIV clinics.  
8 Pre-study meetings were convened in the clinics with facility managers and clinic staff to  
9 promote the study to eligible participants. Prospective participants were approached and  
10 contact established to agree on interview logistics such as dates, times and venues.  
11  
12  
13  
14

15 **Data collection:** In-depth interviews were conducted using an interview guide patterned after  
16 the themes of the conceptual framework of factors affecting implementation outcomes by  
17 Chaudoir et al. (2013). The interviews were led by the lead researcher. The framework groups  
18 factors affecting acceptability under five main categories: structural factors, innovation  
19 characteristics, provider level factors, patient-level factors and organizational factors (Figure  
20 1). The interviews were privately conducted in the English language within the health facilities.  
21 Each session was approximately 45 minutes long and was audio-recorded. Data were collected  
22 between February and April 2017.  
23  
24  
25  
26  
27  
28

29 **Research team and reflexivity:** The corresponding author (EW) is a data analyst, early  
30 career epidemiologist and implementation science researcher. EW was a graduate student and  
31 not affiliated to the sites at the time of study. This provided confidence that the data obtained  
32 from the interviews were solely the participants' perceptions and not influenced by previous  
33 contact. Other authors had no previous contact with the study sites. MA is a research scientist  
34 with interests in implementation science, health policy and systems strengthening research. EE  
35 is a health system, policy and implementation science researcher. LI is an associate professor  
36 in public health, with interests in demography and implementation science. All authors are well  
37 versed in mixed methods research approaches.  
38  
39  
40  
41  
42  
43  
44

45 **Data analysis:** Audio-recorded transcripts were transcribed verbatim. Inductive thematic  
46 analysis was conducted. Data verification for accuracy and completeness was done through  
47 reading and re-reading of the interview transcripts. Coding of the transcripts was done to  
48 identify themes, messages, and patterns emerging from the data. The developed codes were  
49 matched to ensure integrity and similarity between the researchers. A codebook was developed  
50 after integration and collation of the identified codes. From the codebook, broader themes and  
51 sub-themes that emerged from the data were identified and reviewed to ensure they were  
52 appropriate for the interpretation (22). As part of a validation process and to elicit feedback  
53 from the participants, an anonymised summary of the findings was shared with randomly  
54 selected participants.  
55  
56  
57  
58  
59  
60

**Ethical considerations:** Study approval and ethical clearance was obtained from the University of the Witwatersrand Human Research Ethics Committee (HREC) (approval No. M161164), Kenyatta National Hospital - University of Nairobi Ethics and Research Committee (approval No. P11/01/2017) and the Kenya Medical Research Institute Ethics and Research Committee (approval No. RES/7/3/1). A research permit was obtained from the National Commission for Science, Technology and Innovation (NACOSTI) to conduct the study in Nairobi County, Kenya. Participants were briefed about the study and their rights and provided with an information sheet. Informed consent was obtained from all study participants prior to the interviews. Permission to access the selected health facilities was obtained from the management of the respective health facilities.

**Patient and public involvement:** The study aimed to address factors affecting the acceptability of IPT among health care providers, an implementation outcome which may affect the delivery of the intervention to patients. The identified factors may help improve the quality of care for PLHIV by improving the implementation of IPT. Initial findings of the broader study were shared with health care providers. Findings of this study will be shared with broader programme and scientific communities through dissemination workshops, conferences and summary fact-sheets.

## RESULTS

The demographic characteristics of the eighteen health care providers who participated in the in-depth interviews are presented in Table 1.

**Table 1: Demographic characteristics of health care providers who participated in in-depth interviews per health facility**

| Variable                      | Value             | Facility A | Facility B | Facility C | Total |
|-------------------------------|-------------------|------------|------------|------------|-------|
| Sex                           | Males             | 5          | 1          | 1          | 7     |
|                               | Females           | 3          | 4          | 4          | 11    |
| Job category                  | Clinical officers | 3          | 3          | 2          | 8     |
|                               | Nurses            | 2          | 1          | 2          | 4     |
|                               | Counsellors       | 2          | 1          | 1          | 4     |
|                               | Pharmacists       | 1          | 1          | -          | 2     |
| Length of stay in CCC (years) | < 1               | -          | -          | 2          | 2     |
|                               | 2 – 4             | 1          | 1          | -          | 2     |

|             |         |   |   |   |    |
|-------------|---------|---|---|---|----|
|             | > 4     | 7 | 5 | 2 | 14 |
| Age (years) | ≤ 30    | 1 | 2 | 1 | 4  |
|             | 31 – 40 | 5 | 3 | 2 | 10 |
|             | 41 – 50 | 1 | - | - | 1  |
|             | > 50    | 2 | - | 1 | 3  |

### Factors affecting acceptability of IPT among health care providers

Although health care providers considered IPT to be an important intervention in the provision of care for PLHIV, they indicated several concerns with IPT at different levels that challenged their comfort and satisfaction with the intervention. The factors are grouped and presented in the following categories: structural factors, innovation characteristics, provider, patient-related factors, and organizational factors. These results are summarised in figure 2.

#### 1. Structural factors

Structural factors relate to the wider policy environment as well as the physical and working environment of the health care providers.

##### *Inadequate high level support for IPT implementation*

Most of the providers cited limited commitment at policy level in ensuring effective implementation and streamlining of the IPT programme, which consequently demotivated providers. A majority of the providers stated that strong commitment and explicit support from the policy makers and IPT programme managers was necessary for effective implementation of the programme. Areas of support identified included advocacy for IPT, improving supply of isoniazid drugs and proper monitoring and evaluation of the IPT.

*“...there is no initiative by those who are concerned in the TB programme. They need to make sure that they insist on IPT, and put some regulations or some rules to be followed to ensure IPT is given to every eligible patient...” (Non-clinical health care provider)*

*“The people concerned should be more involved in the programme. We are giving IPT but they are not fully engaged. We don’t get any feedback from them. They should monitor the supply of drugs and effects of IPT.” (Clinical health care provider)*

##### *Limited engagement with health care providers in the development of IPT guideline*

Providers lamented that there was pressure from policymakers to implement the IPT policy guidelines during their introduction or revision at the CCCs without provider involvement.



1  
2  
3 They noted that the consequence of this was to prescribe IPT without the full understanding its  
4 implications.  
5

6  
7 *“We were told these are the guidelines and we should follow...before they change the*  
8 *guidelines we should be involved...At the moment I don't feel like we are involved in*  
9 *this....” (Clinical health care provider)*  
10  
11

### 12 13 *Poor integration of IPT-related services*

14  
15 Most of the providers spoke of poor integration of IPT services in the clinic, noting that this  
16 hampered the delivery of the programme. It was noted that most of the clinical examinations  
17 required before IPT initiation were conducted in separate departments at additional costs. They  
18 felt that the examinations should be performed in the same facility and the costs subsidized to  
19 encourage uptake among patients. Most respondents felt that facility management and  
20 policymakers had a key role in supporting effective implementation of the programme  
21

22  
23 *“...if we do [all] the tests from here, it will take like 30 minutes to do everything and*  
24 *give the patient IPT. When they come again for check-ups, we can still do them again*  
25 *from here, and it takes less time and we get results in real time....it will even be faster*  
26 *for the patients” (Clinical health care provider)*  
27  
28  
29  
30  
31  
32

## 33 34 2. Innovation characteristics

35  
36 Innovation factors relate to aspects of the intervention which enhance the chances of successful  
37 implementation. Discussions with health care providers revealed two main issues linked to IPT  
38 as an innovation that hampered its acceptance and implementation in their context. These are  
39 presented below.  
40  
41

### 42 43 *Unclear IPT guidelines and standard operating procedures (SOPs)*

44  
45 Providers expressed discomfort with the IPT guidelines and SOPs citing lack of clarity. In  
46 particular, providers noted that guidelines on eligibility criteria, on how to decide whether a  
47 patient had active and latent TB and on the duration of IPT were unclear. Providers  
48 recommended a revision of the guidelines with specific regard to eligibility criteria and clarity  
49 on ruling-out active and latent TB before prescription. There was also a lack of national  
50 consensus on IPT-related services as part of the HIV/TB collaborative activities since some of  
51 the services differed among facilities. For instance, the provision of IPT with pyridoxine (to  
52 prevent peripheral neuropathy) versus IPT alone and monthly versus three-monthly drug re-  
53 fills were reported to vary from facility to facility.  
54  
55  
56  
57  
58  
59  
60

1  
2  
3 *“I think it [IPT] is a good idea but the problem is with the protocol, the SOPs. They*  
4 *are not very clear. They are not well documented...” (Clinical health care provider)*  
5  
6

7 *“...They told us in the training that we should give IPT every month to the patient. We*  
8 *are not comfortable with it...we prefer three-month refill as we have been doing. Maybe*  
9 *they should re-evaluate these guidelines...” (Clinical health care provider)*  
10  
11  
12

### 13 *Long duration of IPT*

14 Health care providers largely expressed discomfort with the long duration of the IPT treatment  
15 regimen. They reported this to be a critical factor that influenced their delivery of the  
16 intervention mainly because of pill-burden and adverse effects reported by patients on long  
17 term therapy. Most respondents recommended a reduced duration of the drug with the help of  
18 suitable research.  
19  
20  
21  
22

23  
24 *“If I had a chance, I would give an IPT that would be taken once. Not the daily one for*  
25 *six months. That’s a long time...” (Clinical health care provider)*  
26  
27  
28

### 29 3. Provider-related factors

30 Factors related to individual health care providers such as experience and knowledge of IPT  
31 and peer influence also had considerable bearing on the perception and implementation of IPT  
32 in the clinics.  
33  
34

#### 35 *Provider information and training on IPT*

36 Both clinical and non-clinical providers indicated that they needed to be empowered on the  
37 administration of IPT through additional information and training. Some providers cited  
38 limited or no specific training on IPT administration, which limited their ability to deliver the  
39 intervention. They recommended revision of guidelines and additional training on IPT, driven  
40 by policymakers as well as regular monitoring and reporting of IPT outcomes from research to  
41 guide implementation.  
42  
43  
44  
45  
46

47 *“...Some of us have not been taken through training on IPT. It was just introduced and*  
48 *you are told, “Give IPT for this duration” ... I feel we should have been taken through*  
49 *training to know more about the IPT even before rolling it out.” (Clinical health care*  
50 *provider)*  
51  
52  
53

54 *“I have never attended any training. It is just what I read in school and in books. We*  
55 *should be included in IPT training here. It would help a lot.” (Non-clinical health care*  
56 *provider)*  
57  
58  
59  
60

### *Peer influence and perceptions on IPT*

The satisfaction of other health care providers with the intervention influenced their colleagues in the CCCs. Negative perceptions or doubts about the intervention by some health care providers affected the perception and delivery of IPT by the fellow providers.

*“...Colleagues say that patients tell them “I’ve seen a friend of my husband who took [IPT]...”, you know. So that experience with my colleagues from the patients’ mouth talking.... in fact, part of it was the reason why this facility delayed as a hospital to start IPT.” (clinical health care provider)*

### 4. Patient-related factors

Factors relating to the patients were thought to considerably affect health care providers’ perceptions and delivery of IPT. The following are health care providers’ reported patient-related factors affecting provider acceptability of IPT.

#### *Non-adherence to IPT and IPT side effects on Patients*

Non-adherence to IPT after initiation by patients was considered a demotivating factor in administering IPT. Non-adherence was attributed to fear of side-effects and pill burden among the patients. These views were shared by both the clinical and the non-clinical providers. Providers also reported that some patients stopped using the therapy as a result of reported side-effects. These discouraged other patients who became aware of these side-effects from enrolling on the programme. Participants expressed concern that non-adherence would eventually lead to development of resistance to isoniazid drugs in the long run resulting in MDR-TB or extensively drug-resistant TB (XDR-TB). Non-adherence was thought to be more likely among patients with poor immunological, virological and clinical state as well as those on second line anti-retroviral therapy, which made health care providers reluctant in initiating IPT to these patients. Respondents recommended considerations of patient clinical state and drug regimen and argued for these to be added to the IPT guidelines.

*“...At least for them to do a research and find out if these side-effects are really associated with IPT. But if it is found to be safe to use, I would not have any other recommendations...Uptake reduced because they were not starting anyone else on IPT for fear of side-effects and death.” (Clinical health care provider)*

#### *Pill burden among patients*

Health care providers also felt that IPT increased the pill burden among the patients which affected patients’ adherence to the medication. Providers described cases where patients

1  
2  
3 complained of the difficulty in adhering to isoniazid drugs while some completely declined to  
4 take the medication due to the high number of pills prescribed for PLHIV. As a result, providers  
5 recommended that a formulation of IPT with shorter duration for the patients.  
6  
7

8  
9 *“... patients feel that these drugs are so many and some say they don't want to start*  
10 *these drugs altogether...” (Clinical health care provider)*  
11

12  
13 *“...if they can review the concentration now, then maybe find out the concentration that*  
14 *can still work and still be mild to the patients...because of the pill burden to these*  
15 *clients...” (Non-clinical health care provider)*  
16  
17

#### 18 19 *Inadequate patient information on IPT*

20 Information about the benefits and effects of IPT was reported to be limited among the patients.  
21 This resulted in rumours and misconceptions about IPT among the patients which led some  
22 patients to refuse to be initiated or to dispose of the medication even after being counselled.  
23 Providers expressed concern over the lack of consensus and support regarding patient  
24 education activities in the CCCs for IPT.  
25  
26  
27  
28

29  
30 *“...We should conduct continuous medical education, and review how we provide*  
31 *patients with information ...” (Non-clinical health care provider)*  
32

33  
34 *“I think they need to do more education to the people... actually, most clients decline*  
35 *because they have never heard about it...they would say ‘I am being treated for TB yet*  
36 *I don't have TB signs” (Clinical health care provider)*  
37  
38  
39

#### 40 41 5. Organizational factors

42 Organisational factors encompass factors related to the organizational context where IPT is  
43 implemented, in this case the CCCs. These factors affect effective implementation of IPT  
44 programmes.  
45  
46

##### 47 *Increased workload*

48 Most clinical providers complained of the high workload in the facility, which they felt  
49 negatively affected implementation of the IPT programme. Providers reported that the limited  
50 number of clinicians did not match the high volume of patients in the CCC. The procedures to  
51 be conducted on the patient before IPT initiation were also considered very long and hence a  
52 burden to a single clinician. Providers called for hiring of staff to be dedicated to IPT related  
53 activities in the CCCs.  
54  
55  
56  
57  
58  
59  
60

1  
2  
3           *“...by the time you do all the screening for conditions like hepatitis, before even*  
4           *convincing the patient to start IPT... it is a big workload because we have many patients*  
5           *waiting in line to be served.” (Clinical health care provider)*  
6  
7

8  
9           *“To comment about the environment and the working condition, here we have very*  
10           *heavy workload...then if you follow the standard operating procedures to give IPT, it*  
11           *will take you very long to complete all those investigations, examinations and what*  
12           *have you...” (Clinical health care provider)*  
13  
14  
15

### 16 17 *Inconsistent Isoniazid drug supply*

18  
19       Providers also mentioned stock-out of Isoniazid medication and other supplies related to the  
20       IPT programme in the facilities as a major impediment to effective implementation and  
21       acceptance of the therapy. They reported stock-outs in the previous year and considered this a  
22       factor that greatly affected IPT delivery. Some providers felt that the erratic stocks and poor  
23       supply of the medications indicated lack of support for the IPT programme among  
24       policymakers and management. This, in turn, negatively affected their perception, morale and  
25       delivery of the therapy.  
26  
27  
28  
29  
30

31           *“...We started the programme nicely, empowering patients, counselling them on IPT,*  
32           *and encouraging them to take IPT... and then all of a sudden from nowhere, IPT drugs*  
33           *are not available” (clinical health care provider)*  
34  
35

36  
37           *“My biggest challenge with the management [in CCC] is when there is erratic supply*  
38           *of IPT...So the patients were out of medication for some time and when you send them*  
39           *out to buy them; of course it's not possible for them to get the drug...” (Clinical health*  
40           *care provider)*  
41  
42  
43  
44

## 45 **DISCUSSION**

46  
47       This study assessed the factors associated with provider acceptability of IPT in selected clinics  
48       in Nairobi City County in Kenya. Based on an adapted framework, identified factors have been  
49       grouped into five broad categories viz. structural factors, innovation characteristics, provider,  
50       patient-related factors, and organizational factors.  
51  
52  
53

54  
55       Among these findings, limited high-level commitment and support for the IPT programme by  
56       higher programme managers and policymakers stood out as perhaps the biggest barrier to  
57       successful IPT implementation. Discussions with health care providers reaffirmed previous  
58       findings that supportive supervision, consistent engagement between policy makers and  
59         
60

1  
2  
3 higher-level supervisors with health care providers as well as the in-depth interaction between  
4 policymakers and practitioners remain crucial for effective IPT implementation. The findings  
5 support previous evidence from similar contexts that showed that poor monitoring and lack of  
6 supervision of the IPT programme by higher managers influence IPT uptake (11, 23).  
7  
8  
9

10  
11 Linked to high-level commitment and support is provider involvement in the formulation of  
12 policies and guidelines. The study found limited involvement of the health care providers in  
13 the enactment and implementation of the IPT guidelines. As a result, most respondents were  
14 not comfortable implementing the guidelines in their clinics. Since only a few had received  
15 training and/or support in IPT implementation, they saw it as a challenge rather than an  
16 opportunity to improve the health of their clients. In fact, providers across all the three facilities  
17 expressed their frustrations that they were being pressured to implement and deliver an  
18 intervention whose origin or implications they knew little about. The lukewarm ownership of  
19 IPT among providers as a result of the limited engagement at design stage is not surprising and  
20 reinforces evidence in this area suggesting that successful implementation and compliance with  
21 such initiatives require mechanisms that help enforce official guidelines, address capacity gaps,  
22 and enhance provider and patient awareness (24).  
23  
24  
25  
26  
27  
28  
29  
30

31 Another important finding from this study is how the nature of interventions (in this case IPT)  
32 affect implementation outcomes. The lack of clarity on some of the provisions of the guidelines  
33 meant that providers struggled to fully and effectively implement IPT provisions. This in turn,  
34 negatively impacted their acceptability of the intervention. This finding resonates with  
35 evidence from other studies (23, 25), and echoes the need for a well-planned engagement  
36 process with care givers whenever such guidelines are being developed and the need to make  
37 them as simple as possible.  
38  
39  
40  
41  
42  
43  
44

45 Better integration of IPT-related services at the clinics could significantly improve the delivery  
46 of IPT. Integration could entail incorporation of all or most of the IPT-related procedures in  
47 one room/space. This can reduce challenges such as loss-to-follow-up in TB/HIV treatment  
48 thereby assisting health care providers monitor the patients on IPT. Ultimately, this would  
49 lessen clinical provider workload. Lack of coordination between TB and HIV activities has  
50 been reported as a barrier to IPT implementation elsewhere (23). One study indicated that  
51 performing reading and interpreting tuberculin skin tests (TSTs) in the context of busy HIV  
52 clinics was a challenge for both patients and staff, negatively affecting the implementation of  
53 the IPT programme (26). In our study, providers questioned the efficacy of Kenya's IPT  
54 approach to identifying latent TB which involves a symptomatic algorithm using a standard  
55  
56  
57  
58  
59  
60

1  
2  
3 Ministry of Health ICF/IPT screening tool and no Tuberculin Skin Test for IPT eligibility.  
4 Health care providers have previously called for clarity of guidelines, showing that this is a  
5 major challenge to effective implementation and acceptance of IPT (26). This may also explain  
6 the lack of awareness among some providers of the benefits of IPT in some LMIC (23).  
7 Investigation of optimal duration, safety and efficacy of IPT and its role in reducing TB risk,  
8 particularly under programme conditions has been strongly recommended by the WHO (27).  
9

10  
11 Previous studies have hypothesised that provider-level factors could predict implementation  
12 outcomes (28, 29). In our study, provider-related factors such as limited information and  
13 inadequate empowerment on IPT influenced acceptability of IPT. A general lack of knowledge  
14 and experience with IPT have also been reported as primary barriers to IPT implementation in  
15 South Africa and Ethiopia (23). It is therefore important that provider training and information  
16 is prioritised for both clinical and non-clinical providers before implementation to achieve the  
17 desired outcomes (30). Providers in our study also reported that lack of on-the-job training and  
18 support through mentorship and supportive supervision left them feeling inadequately  
19 equipped to handle emerging challenges associated with IPT implementation. These challenges  
20 highlight the need for tailor-made technical assistance during implementation including  
21 mentorship, retraining of the providers, training new staff, emotional support, and mechanisms  
22 that take into consideration the contextual challenges.  
23

24  
25 Another important determinant of IPT acceptability among providers in the study location were  
26 patient-level predictors. In our context, poor adherence and pill burden among patients were  
27 key barriers to IPT acceptance among providers and patients (as reported by providers).  
28 Previous studies have associated poor adherence to IPT with isoniazid resistance, which has  
29 made health care providers less likely to prescribe IPT (11, 31). Pill burden has also been  
30 perceived by health care providers as a cause of non-adherence causing them to be hesitant in  
31 prescribing IPT to patients with high number of pills (11, 32). Adherence to IPT treatment is a  
32 critical factor to be considered when scaling treatment services, especially in areas with high  
33 TB incidence rates. Despite poor patient adherence being a key factor affecting acceptability,  
34 there was lack of information among providers on evidence-based methods to monitor IPT  
35 adherence among patients. This might signify poor or lack of implementation of methods such  
36 as use of treatment buddies, lay health providers, community-based directly observed  
37 preventive therapy to monitor and enhance IPT adherence. The availability of resources for  
38 close monitoring, supervision and evaluation of IPT outcomes is strongly recommended by  
39 WHO (33).  
40  
41  
42  
43  
44  
45  
46  
47  
48  
49  
50  
51  
52  
53  
54  
55  
56  
57  
58  
59  
60

1  
2  
3 Even though we used an exploratory approach to investigate IPT acceptance among providers,  
4 the providers reporting fear of isoniazid drug-resistance among patients should be cause for  
5 concern. This is particularly so because of the gradual increase in drug-resistant TB cases in  
6 Kenya (from 112 to 1300 in 2016) (15). Policymakers, health care providers and practitioners  
7 have questioned the implications of poor IPT adherence to drug-resistant TB disease especially  
8 in the case of long course INH mono-therapy (34, 35). To improve information on IPT among  
9 patients and boost uptake, national advocacy and patient awareness is needed, among other  
10 interventions.  
11

12  
13 In the organizational context, heavy workload on health care providers and isoniazid stock-  
14 outs in the HIV clinics discouraged providers from initiating IPT, fearing poor adherence and  
15 associated side effects among their patients. Heavy workload among providers can often result  
16 in compromised quality and should be addressed as part of organisational context reforms to  
17 support IPT. In our study, this could be explained by the fact that the study clinics served a  
18 large population catchment area and not necessarily because the quality offered attracted  
19 patients to the clinics. Another reason for the heavy workload was inadequate staffing  
20 especially with regards to IPT trained staff. Ultimately, both factors affected the quality of care  
21 patients received.  
22

23  
24 The findings of this study have important policy implications. Firstly, the lack of clarity of IPT  
25 guidelines highlights a need for revision and standardization which would promote consensus  
26 among health care providers. Secondly, the findings highlight the need for strengthened  
27 monitoring and evaluation with a well-defined feedback mechanism of reporting by health care  
28 providers on IPT indicators. Finally, building both technical and logistic capacity in HIV clinics  
29 is important to improving the acceptability and ultimately the delivery of IPT.  
30

31  
32 We recommend a number of interventions to improve health care provider acceptability in the  
33 study clinics and which may be explored in other similar contexts. First, involving health care  
34 providers in IPT guideline development and revision will make them more comfortable with  
35 implementation. Secondly, better integration of all IPT-related services in the same facility  
36 may help improve patient initiation, retention and follow-up of IPT. Additionally, training and  
37 continuous mentorship on IPT implementation for both clinical and non-clinical providers  
38 should be promoted in the health facilities to improve IPT acceptability and delivery.  
39  
40  
41  
42  
43  
44  
45  
46  
47  
48  
49  
50  
51  
52  
53  
54  
55  
56  
57  
58  
59  
60



### Strengths and Limitations

This study, to our knowledge, is among the first to assess the factors influencing the acceptability of IPT among health care providers in selected HIV clinics in Nairobi County, Kenya. The adaptation of existing theory and literature to guide the study enabled the collection of exhaustive context-specific information at different levels of the health system. The inclusion of both clinical and non-clinical personnel as key-informants in the interviews enabled the collection of information at different levels and cadres of health service provision thereby enhancing validity of the data. This study adhered to the Standards for Reporting Qualitative Research (SRQR).

Purposive selection of the health facilities may limit the generalizability of the findings from this study to other HIV clinics in Nairobi County. However, the study was context-specific and the aim was to elicit in-depth information on IPT acceptability in this context, which may inform health service provision and policy in health systems of similar context.

Finally, the study was conducted among city hospitals, which are presumably better resourced as compared to those in other locations. Therefore, the IPT programme was expected to be better managed as opposed to other non-city HIV clinics. This could contribute to better acceptability of IPT among the providers whose concerns may not entirely reflect that of health care providers in other clinics in Nairobi County. Further studies aiming for generalizability should control for the tier of health facilities in assessing IPT acceptability.

### Conclusion

The study gives insight of the complexity of factors affecting IPT implementation and the value of qualitative methods and guiding frameworks to elucidate these factors. The acceptability of IPT among health care providers in this context was influenced by factors at different levels namely: structural factors, innovation characteristics, provider, patient-related factors, and organizational factors. Ensuring optimal acceptability of IPT among health care providers will require a robust engagement with both providers and patients by policy makers and IPT program managers, as well as on-the-job design specific actions to support providers in implementation. This high level commitment and support for IPT could improve provider acceptability and ultimately delivery of the intervention.

## Acknowledgements

The authors are grateful to the management and staff at comprehensive care centres of the selected health facilities for their cooperation, perspectives and support during the study. Much gratitude also goes to the School of Public Health, Faculty of Health Sciences at the University of the Witwatersrand, Johannesburg, South Africa for the immense support that facilitated the timely completion of the study.

**Funding:** This work was funded by TDR, the Special Programme for Research and Training in Tropical Diseases, which is hosted at the World Health Organization and co-sponsored by UNICEF, UNDP, the World Bank and WHO. TDR grant number: B40299. First author ORCID ID: 0000-0002-4149-3417

**Data sharing statement:** No additional data are available.

**Competing interests:** The authors declare that they do not have any competing interests.

**Ethics approval:** Study approval and ethical clearance to conduct the research was obtained from the University of the Witwatersrand Human Research Ethics Committee (HREC) (approval No. M161164), The Kenyatta National Hospital-University of Nairobi Ethics and Research Committee (approval No. P11/01/2017) and the Kenya Medical Research Institute Ethics and Research Committee (approval No. RES/7/3/1). A research permit was obtained from the National Commission for Science, Technology and Innovation (NACOSTI) to conduct the study in Nairobi County, Kenya.

**Patient consent:** Informed consent was obtained from all study participants prior to the interviews.

**Author contributions:** EW, MA, and LI contributed to the conceptualisation and design of the study including the development of the study tools. EW collected the data and did initial analysis and drafts of the manuscript. EE, MA and LI contributed to the data analysis, manuscript writing and editing. All authors read and approved the final version of the manuscript.

## REFERENCES

1. World Health Organization. Global Tuberculosis Report 2017. Geneva; 2017.
2. Sharma S, Mohan A, Kadhiraivan T. HIV-TB co-infection: epidemiology, diagnosis & management. *Indian J Med Res*. 2005;121(4):550-67.
3. Pawlowski A, Jansson M, Sköld M, Rottenberg ME, Källenius G. Tuberculosis and HIV co-infection. *PLoS pathogens*. 2012;8(2):e1002464.
4. World Health Organization. Use of high burden country lists for TB by WHO in the post-2015 era. Geneva: World Health Organization. 2015.

5. Ministry of Health. Kenya tuberculosis prevalence survey. Kenya; 2016.
6. National Tuberculosis Leprosy and Lung Disease Program (NTLD-P). Annual Report 2015. Kenya; 2015.
7. National AIDS and STI Control Program. Kenya HIV County Profiles 2016. Kenya; 2016.
8. World Health Organization. WHO policy on collaborative TB/HIV activities: guidelines for national programmes and other stakeholders. WHO policy on collaborative TB/HIV activities: guidelines for national programmes and other stakeholders 2012.
9. Getahun H, Van Gorkom J, Harries A, Harrington M, Nunn P. Interim policy on collaborative TB/HIV activities. 2004.
10. World Health Organization. WHO THREE I's MEETING: Intensified Case Finding (ICF), Isoniazid Preventive Therapy (IPT) and TB Infection Control (IC) for people living with HIV. Geneva; 2008.
11. Teklay G, Teklu T, Legesse B, Tedla K, Klinkenberg E. Barriers in the implementation of isoniazid preventive therapy for people living with HIV in Northern Ethiopia: a mixed quantitative and qualitative study. *BMC public health*. 2016;16(1):840.
12. World Health Organization. Recommendation on 36 months isoniazid preventive therapy to adults and adolescents living with HIV in resource-constrained and high TB-and HIV-prevalence settings–2015 update: World Health Organization; 2015.
13. World Health Organization. Guidelines for intensified tuberculosis case-finding and isoniazid preventive therapy for people living with HIV in resource-constrained settings. Geneva; 2011.
14. National Tuberculosis Leprosy and Lung Disease Program (NTLD-P). Isoniazid Preventive Therapy Kenya, 2016. [Available from: <https://www.nltip.co.ke/2016/05/26/1545-2/>].
15. World Health Organization. Global Tuberculosis Report 2016. Geneva, Switzerland; 2016.
16. Sekhon M, Cartwright M, Francis JJ. Acceptability of healthcare interventions: an overview of reviews and development of a theoretical framework. *BMC health services research*. 2017;17(1):88.
17. Proctor EK, Landsverk J, Aarons G, Chambers D, Glisson C, Mittman B. Implementation research in mental health services: an emerging science with conceptual, methodological, and training challenges. *Administration and Policy in Mental Health and Mental Health Services Research*. 2009;36(1):24-34.
18. Peters DH, Adam T, Alonge O, Agyepong IA, Tran N. Implementation research: what it is and how to do it. *Bmj*. 2013;347:f6753.
19. Proctor E, Silmere H, Raghavan R, Hovmand P, Aarons G, Bunger A, et al. Outcomes for implementation research: conceptual distinctions, measurement challenges, and research agenda. *Administration and Policy in Mental Health and Mental Health Services Research*. 2011;38(2):65-76.
20. O'Brien BC, Harris IB, Beckman TJ, Reed DA, Cook DA. Standards for reporting qualitative research: a synthesis of recommendations. *Academic Medicine*. 2014;89(9):1245-51.
21. Kenya National Bureau of Statistics. The 2009 Kenya Population and Housing Census: Population Distribution by Age, Sex and Administrative Units. Kenya. Kenya; 2010.
22. Braun V, Clarke V. Using thematic analysis in psychology. *Qualitative research in psychology*. 2006;3(2):77-101.
23. Lester R, Hamilton R, Charalambous S, Dwadwa T, Chandler C, Churchyard GJ, et al. Barriers to implementation of isoniazid preventive therapy in HIV clinics: a qualitative study. *Aids*. 2010;24:S45-S8.

- 1  
2  
3  
4  
5  
6  
7  
8  
9  
10  
11  
12  
13  
14  
15  
16  
17  
18  
19  
20  
21  
22  
23  
24  
25  
26  
27  
28  
29  
30  
31  
32  
33  
34  
35  
36  
37  
38  
39  
40  
41  
42  
43  
44  
45  
46
24. Atela M, Bakibinga P, Ettarh R, Kyobutungi C, Cohn S. Strengthening health system governance using health facility service charters: a mixed methods assessment of community experiences and perceptions in a district in Kenya. *BMC health services research*. 2015;15(1):539.
  25. Makoni A, Chemhuru M, Tshimanga M, Gombe NT, Mungati M, Bangure D. Evaluation of the isoniazid preventive therapy (IPT) program in Shurugwi District, Midlands Province, Zimbabwe, January 2013 to August 2014. *BMC research notes*. 2015;8(1):476.
  26. Ait-Khaled N, Alarcon E, Bissell K, Boillot F, Caminero J, Chiang C, et al. Isoniazid preventive therapy for people living with HIV: public health challenges and implementation issues [Unresolved issues]. *The International Journal of Tuberculosis and Lung Disease*. 2009;13(8):927-35.
  27. World Health Organization. The Global Plan to Stop TB 2011 - 2015. Geneva; 2011.
  28. Durlak JA, DuPre EP. Implementation matters: A review of research on the influence of implementation on program outcomes and the factors affecting implementation. *American journal of community psychology*. 2008;41(3-4):327.
  29. Damschroder LJ, Aron DC, Keith RE, Kirsh SR, Alexander JA, Lowery JC. Fostering implementation of health services research findings into practice: a consolidated framework for advancing implementation science. *Implementation science*. 2009;4(1):50.
  30. Wandersman A, Duffy J, Flaspohler P, Noonan R, Lubell K, Stillman L, et al. Bridging the gap between prevention research and practice: The interactive systems framework for dissemination and implementation. *American journal of community psychology*. 2008;41(3-4):171-81.
  31. Mindachew M, Deribew A, Memiah P, Biadgilign S. Perceived barriers to the implementation of Isoniazid preventive therapy for people living with HIV in resource constrained settings: a qualitative study. *Pan African Medical Journal*. 2014;17(1).
  32. Makanjuola T, Taddese HB, Booth A. Factors associated with adherence to treatment with isoniazid for the prevention of tuberculosis amongst people living with HIV/AIDS: a systematic review of qualitative data. *PloS one*. 2014;9(2):e87166-e.
  33. World Health Organization. Guide to Monitoring and Evaluation for Collaborative TB/HIV Activities--2015 Update: World Health Organization; 2015.
  34. Vitoria M, Granich R, Banda M, Fox MY, Gilks C. Implementation of co-trimoxazole prophylaxis and isoniazid preventive therapy for people living with HIV. *Bulletin of the World Health Organization*. 2010;88:253-9.
  35. Woldehanna S, Volmink J. Treatment of latent tuberculosis infection in HIV infected persons. *The Cochrane database of systematic reviews*. 2004(1):Cd000171.

#### 47 **Figure legends**

48 Figure 1 Conceptual framework of factors affecting acceptability of IPT among health care  
49 providers. Adapted from Chaudoir et al. (2013)

50 Figure 2 Conceptual framework of factors influencing the acceptability of IPT among health  
51 care providers in selected HIV clinics in Nairobi County, Kenya

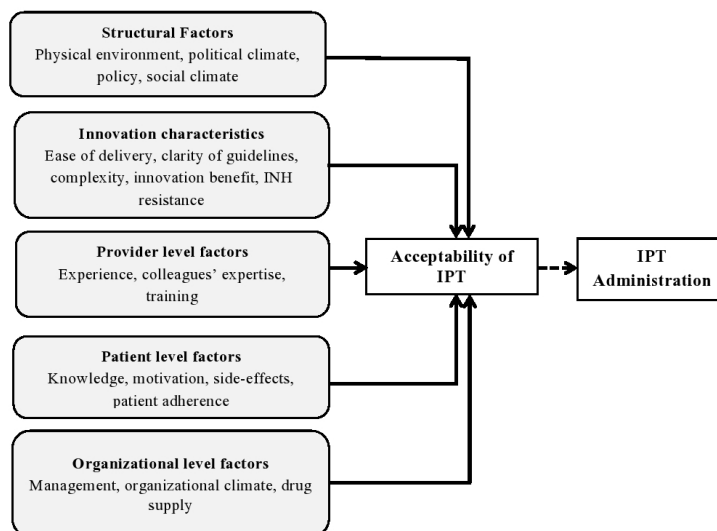

Conceptual framework of factors affecting acceptability of IPT among health care providers. Adapted from Chaudoir et al. (2013)

107x139mm (300 x 300 DPI)

1  
2  
3  
4  
5  
6  
7  
8  
9  
10  
11  
12  
13  
14  
15  
16  
17  
18  
19  
20  
21  
22  
23  
24  
25  
26  
27  
28  
29  
30  
31  
32  
33  
34  
35  
36  
37  
38  
39  
40  
41  
42  
43  
44  
45  
46  
47  
48  
49  
50  
51  
52  
53  
54  
55  
56  
57  
58  
59  
60

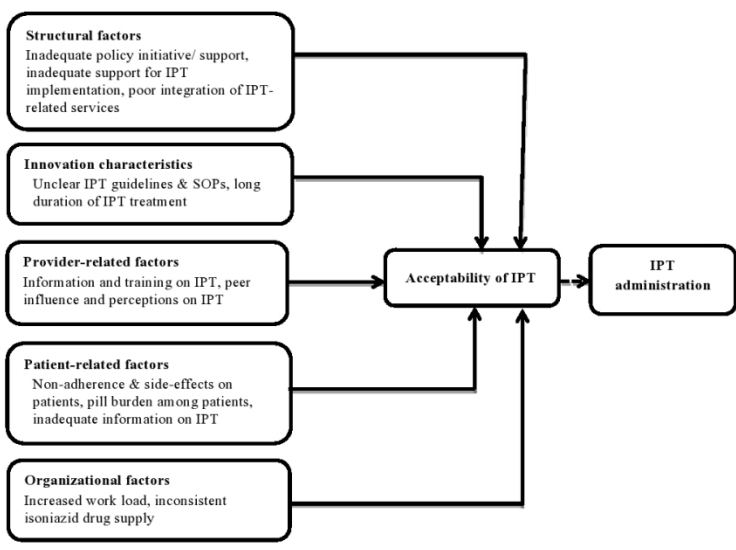

Conceptual framework of factors influencing the acceptability of IPT among health care providers in selected HIV clinics in Nairobi County, Kenya

107x139mm (300 x 300 DPI)

# Reporting checklist for qualitative study.

Based on the SRQR guidelines.

## Instructions to authors

Complete this checklist by entering the page numbers from your manuscript where readers will find each of the items listed below.

Your article may not currently address all the items on the checklist. Please modify your text to include the missing information. If you are certain that an item does not apply, please write "n/a" and provide a short explanation.

Upload your completed checklist as an extra file when you submit to a journal.

In your methods section, say that you used the SRQR reporting guidelines, and cite them as:

O'Brien BC, Harris IB, Beckman TJ, Reed DA, Cook DA. Standards for reporting qualitative research: a synthesis of recommendations. Acad Med. 2014;89(9):1245-1251.

|                                            | Reporting Item                                                                                                                                                                                                                                                                                                                                                                                                                                                                                                                                                                                                                          | Page Number |
|--------------------------------------------|-----------------------------------------------------------------------------------------------------------------------------------------------------------------------------------------------------------------------------------------------------------------------------------------------------------------------------------------------------------------------------------------------------------------------------------------------------------------------------------------------------------------------------------------------------------------------------------------------------------------------------------------|-------------|
|                                            | #1 Concise description of the nature and topic of the study identifying the study as qualitative or indicating the approach (e.g. ethnography, grounded theory) or data collection methods (e.g. interview, focus group) is recommended                                                                                                                                                                                                                                                                                                                                                                                                 | 1           |
|                                            | #2 Summary of the key elements of the study using the abstract format of the intended publication; typically includes background, purpose, methods, results and conclusions                                                                                                                                                                                                                                                                                                                                                                                                                                                             | 2           |
| Problem formulation                        | #3 Description and significance of the problem / phenomenon studied: review of relevant theory and empirical work; problem statement                                                                                                                                                                                                                                                                                                                                                                                                                                                                                                    | 4,5,6       |
| Purpose or research question               | #4 Purpose of the study and specific objectives or questions                                                                                                                                                                                                                                                                                                                                                                                                                                                                                                                                                                            | 2,6         |
| Qualitative approach and research paradigm | #5 Qualitative approach (e.g. ethnography, grounded theory, case study, phenomenology, narrative research) and guiding theory if appropriate; identifying the research paradigm (e.g. postpositivist, constructivist / interpretivist) is also recommended; rationale. The rationale should briefly discuss the justification for choosing that theory, approach, method or technique rather than other options available; the assumptions and limitations implicit in those choices and how those choices influence study conclusions and transferability. As appropriate the rationale for several items might be discussed together. | 6           |
| Researcher characteristics                 | #6 Researchers' characteristics that may influence the research, including personal                                                                                                                                                                                                                                                                                                                                                                                                                                                                                                                                                     | 7           |

|    |                               |     |                                                                                               |       |
|----|-------------------------------|-----|-----------------------------------------------------------------------------------------------|-------|
| 1  | and reflexivity               |     | attributes, qualifications / experience, relationship with participants, assumptions and / or |       |
| 2  |                               |     | presuppositions; potential or actual interaction between researchers' characteristics and     |       |
| 3  |                               |     | the research questions, approach, methods, results and / or transferability                   |       |
| 4  |                               |     |                                                                                               |       |
| 5  | Context                       | #7  | Setting / site and salient contextual factors; rationale                                      | 6     |
| 6  |                               |     |                                                                                               |       |
| 7  |                               |     |                                                                                               |       |
| 8  | Sampling strategy             | #8  | How and why research participants, documents, or events were selected; criteria for           | 6-7   |
| 9  |                               |     | deciding when no further sampling was necessary (e.g. sampling saturation); rationale         |       |
| 10 |                               |     |                                                                                               |       |
| 11 |                               |     |                                                                                               |       |
| 12 | Ethical issues pertaining to  | #9  | Documentation of approval by an appropriate ethics review board and participant               | 8     |
| 13 | human subjects                |     | consent, or explanation for lack thereof; other confidentiality and data security issues      |       |
| 14 |                               |     |                                                                                               |       |
| 15 |                               |     |                                                                                               |       |
| 16 | Data collection methods       | #10 | Types of data collected; details of data collection procedures including (as appropriate)     | 7     |
| 17 |                               |     | start and stop dates of data collection and analysis, iterative process, triangulation of     |       |
| 18 |                               |     | sources / methods, and modification of procedures in response to evolving study               |       |
| 19 |                               |     | findings; rationale                                                                           |       |
| 20 |                               |     |                                                                                               |       |
| 21 |                               |     |                                                                                               |       |
| 22 |                               |     |                                                                                               |       |
| 23 | Data collection instruments   | #11 | Description of instruments (e.g. interview guides, questionnaires) and devices (e.g. audio    | 7     |
| 24 | and technologies              |     | recorders) used for data collection; if / how the instruments(s) changed over the course of   |       |
| 25 |                               |     | the study                                                                                     |       |
| 26 |                               |     |                                                                                               |       |
| 27 |                               |     |                                                                                               |       |
| 28 | Units of study                | #12 | Number and relevant characteristics of participants, documents, or events included in the     | 6     |
| 29 |                               |     | study; level of participation (could be reported in results)                                  |       |
| 30 |                               |     |                                                                                               |       |
| 31 |                               |     |                                                                                               |       |
| 32 | Data processing               | #13 | Methods for processing data prior to and during analysis, including transcription, data       | 7     |
| 33 |                               |     | entry, data management and security, verification of data integrity, data coding, and         |       |
| 34 |                               |     | anonymisation / deidentification of excerpts                                                  |       |
| 35 |                               |     |                                                                                               |       |
| 36 |                               |     |                                                                                               |       |
| 37 | Data analysis                 | #14 | Process by which inferences, themes, etc. were identified and developed, including the        | 7     |
| 38 |                               |     | researchers involved in data analysis; usually references a specific paradigm or              |       |
| 39 |                               |     | approach; rationale                                                                           |       |
| 40 |                               |     |                                                                                               |       |
| 41 |                               |     |                                                                                               |       |
| 42 |                               |     |                                                                                               |       |
| 43 | Techniques to enhance         | #15 | Techniques to enhance trustworthiness and credibility of data analysis (e.g. member           | 7     |
| 44 | trustworthiness               |     | checking, audit trail, triangulation); rationale                                              |       |
| 45 |                               |     |                                                                                               |       |
| 46 |                               |     |                                                                                               |       |
| 47 | Syntheses and interpretation  | #16 | Main findings (e.g. interpretations, inferences, and themes); might include development       | 8-14  |
| 48 |                               |     | of a theory or model, or integration with prior research or theory                            |       |
| 49 |                               |     |                                                                                               |       |
| 50 |                               |     |                                                                                               |       |
| 51 | Links to empirical data       | #17 | Evidence (e.g. quotes, field notes, text excerpts, photographs) to substantiate analytic      | 8-14  |
| 52 |                               |     | findings                                                                                      |       |
| 53 |                               |     |                                                                                               |       |
| 54 |                               |     |                                                                                               |       |
| 55 | Intergration with prior work, | #18 | Short summary of main findings; explanation of how findings and conclusions connect           | 14-17 |
| 56 | implications, transferability |     | to, support, elaborate on, or challenge conclusions of earlier scholarship; discussion of     |       |
| 57 | and contribution(s) to the    |     | scope of application / generalizability; identification of unique contributions(s) to         |       |
| 58 |                               |     |                                                                                               |       |
| 59 |                               |     |                                                                                               |       |
| 60 |                               |     |                                                                                               |       |



|    |                       |                                                                                              |    |
|----|-----------------------|----------------------------------------------------------------------------------------------|----|
| 1  | field                 | scholarship in a discipline or field                                                         |    |
| 2  |                       |                                                                                              |    |
| 3  | Limitations           | #19 Trustworthiness and limitations of findings                                              | 18 |
| 4  |                       |                                                                                              |    |
| 5  | Conflicts of interest | #20 Potential sources of influence of perceived influence on study conduct and conclusions;  | 19 |
| 6  |                       | how these were managed                                                                       |    |
| 7  |                       |                                                                                              |    |
| 8  |                       |                                                                                              |    |
| 9  | Funding               | #21 Sources of funding and other support; role of funders in data collection, interpretation | 19 |
| 10 |                       | and reporting                                                                                |    |
| 11 |                       |                                                                                              |    |

12 The SRQR checklist is distributed with permission of Wolters Kluwer © 2014 by the Association of American Medical Colleges. This  
13 checklist was completed on 18. May 2018 using <http://www.goodreports.org/>, a tool made by the [EQUATOR Network](#) in collaboration  
14 with [Penelope.ai](#)  
15  
16  
17  
18  
19  
20  
21  
22  
23  
24  
25  
26  
27  
28  
29  
30  
31  
32  
33  
34  
35  
36  
37  
38  
39  
40  
41  
42  
43  
44  
45  
46  
47  
48  
49  
50  
51  
52  
53  
54  
55  
56  
57  
58  
59  
60
